1 **Title: Multi-Scale LM/EM Neuronal Imaging from Brain to Synapse with a Tissue Clearing**  
2 **Method, Sca/eSF**

3  
4 **Short title: Multi-Scale LM/EM Neuronal Imaging with Sca/eSF**

5  
6 **Authors**

7 Takahiro Furuta,<sup>1†</sup> Kenta Yamauchi,<sup>2,3†</sup> Shinichiro Okamoto,<sup>2,3</sup> Megumu Takahashi,<sup>2,4</sup> Soichiro  
8 Kakuta,<sup>5</sup> Yoko Ishida,<sup>2</sup> Aya Takenaka,<sup>1</sup> Atsushi Yoshida,<sup>1</sup> Yasuo Uchiyama,<sup>6</sup> Masato Koike,<sup>2,3</sup>  
9 Kaoru Isa,<sup>4</sup> Tadashi Isa,<sup>4,7</sup> Hiroyuki Hioki<sup>2\*</sup>

10  
11 **Affiliations**

12 <sup>1</sup>Department of Oral Anatomy and Neurobiology, Graduate School of Dentistry, Osaka University,  
13 Suita, Osaka 565-0871, Japan.

14 <sup>2</sup>Department of Cell Biology and Neuroscience, Juntendo University Graduate School of Medicine,  
15 Bunkyo-Ku, Tokyo 113-8421, Japan.

16 <sup>3</sup>Advanced Research Institute for Health Sciences, Juntendo University, Bunkyo-Ku, Tokyo 113-  
17 8421, Japan.

18 <sup>4</sup>Department of Neuroscience, Graduate School of Medicine, Kyoto University, Kyoto, Kyoto 606-  
19 8501, Japan.

20 <sup>5</sup>Laboratory of Morphology and Image Analysis, Research Support Center, Juntendo University  
21 Graduate School of Medicine, Bunkyo-Ku, Tokyo 113-8421, Japan.

22 <sup>6</sup>Department of Cellular and Molecular Neuropathology, Juntendo University Graduate School of  
23 Medicine, Bunkyo-Ku, Tokyo 113-8421, Japan.

24 <sup>7</sup>Institute for the Advanced Study of Human Biology (WPI-ASHBi), Kyoto University, Kyoto,  
25 Kyoto 606-8501, Japan.

26 <sup>†</sup>These authors contributed equally to this work.

27 <sup>\*</sup>To whom correspondence should be addressed: Hiroyuki Hioki, M.D., Ph.D.

28  
29 **Abstract**

30 The mammalian brain is organized over sizes that span several orders of magnitude, from  
31 synapses to the entire brain. Thus, a technique to visualize neural circuits across multiple spatial  
32 scales (multi-scale neuronal imaging) is vital for deciphering brain-wide connectivity. Here, we  
33 developed this technique by coupling successive light microscope/electron microscope (LM/EM)  
34 imaging with an ultrastructurally-preserved tissue clearing method, Sca/eSF. Our multi-scale  
35 neuronal imaging incorporates 1) brain-wide macroscopic observation, 2) mesoscopic circuit  
36 mapping, 3) microscopic subcellular imaging, and 4) EM imaging of nanoscopic structures, allowing  
37 seamless integration of structural information from the brain to synapses. We applied the technique  
38 to three neural circuits of two different species, mouse striatofugal, mouse callosal, and marmoset  
39 corticostriatal projection systems, and succeeded in the simultaneous interrogation of their circuit  
40 structure and synaptic connectivity in a targeted way. Our multi-scale neuronal imaging will  
41 significantly advance the understanding of brain-wide connectivity by expanding the scales of  
42 objects.

43 **MAIN TEXT**

44 **Introduction**

45         Connectomics, a description of a wiring diagram of the nervous system, is fundamental for  
46 understanding of how the neural circuits process information and generate behavior (1, 2). The  
47 mammalian brain contains a heterogeneous mixture of billions of neurons with trillions of synapses.  
48 Neurons elaborate highly specialized processes that can be over a meter in length for transmitting  
49 and receiving information, whereas synapses that connect neurons to one another are several hundred  
50 nanometers in size. Hence, the imaging scale required for deciphering brain-wide connectivity of  
51 mammalian brains is more than several orders of magnitude (3).

52         Electron microscopy (EM) provides an unparalleled resolution to trace nanometer-thin  
53 neuronal processes and identify a synapse unambiguously. Recent advances in volume EM, such as  
54 serial block-face scanning EM (SBF-SEM), focused ion beam milling and SEM (FIB-SEM),  
55 automated tape-collecting ultramicrotomy (ATUM) with SEM (ATUM-SEM), transmission-mode  
56 SEM (tSEM), and transmission EM (TEM) camera array (TEMCA), have enabled us to see  
57 ultrastructure within a significant volume of brain, opening up the possibility of assembling a  
58 connectome of a mammalian brain (4, 5). However, current analysis has been limited to small  
59 volumes of tens to hundreds of micrometers in extent (6-9).

60         Fluorescence light microscopy (LM) coupled with genetic labeling methods allows tracking  
61 of neuronal processes over long distances to assemble mesoscale connectomic maps for the mouse  
62 cerebral cortex and thalamus (10, 11) and reconstruct individual neurons with subcellular resolution  
63 (12, 13). Of particular note, tissue clearing techniques have drastically improved the depth-  
64 independent observation of biological samples with fluorescence LM, facilitating connectomic  
65 analysis with the scales from the macroscopic/brain to microscopic/subcellular level (14-16).  
66 However, despite its fundamental advances in spatial resolution (17), the resolution of LM does not  
67 match the size of a synapse that defines neuronal connectivity. Indeed, axodendritic contacts  
68 identified by LM observation are only partially predictive of whether synapses are actually formed  
69 (18, 19). Importantly, a synapse, which consists of presynaptic membrane, postsynaptic membrane,  
70 and a synaptic cleft (chemical synapses) or a neuronal gap junction (electrical synapses), is defined  
71 by EM observation (20, 21).

72         Here, we developed a technique to decipher brain-wide connectivity across multiple spatial  
73 scales by coupling successive LM and EM (LM/EM) imaging with a tissue clearing technique  
74 (multi-scale LM/EM neuronal imaging). To achieve the imaging, we developed a glutaraldehyde  
75 (GA)-resistant tissue clearing technique, Sca/eSF. We further implemented LM/EM dual labeling  
76 that remained stable in the clearing protocol. We applied this technique to mouse striatofugal and  
77 marmoset corticostriatal projection systems, and succeeded in the simultaneous interrogation of their  
78 circuit structure and synaptic connectivity. In addition, we took advantage of the fact that our  
79 developed imaging system permitted high-speed LM imaging of substantial tissue volume at high-  
80 resolution followed by subsequent EM observation to capture scarce synaptic contacts with  
81 nanoscale resolution formed by brain-wide connectivity. We identified and tracked mouse callosal  
82 inputs onto parvalbumin (PV)-positive neocortical interneurons in a targeted way across multiple  
83 spatial scales. Our multi-scale neuronal imaging will significantly advance the deciphering of brain-  
84 wide connectivity and extend the current comprehensive connectomic analysis.

## 85 Results

### 86 *ScaleSF is a tissue clearing method for multi-scale LM/EM neuronal imaging*

87 Multi-scale LM/EM neuronal imaging requires a technique for tissue clearing that achieves a  
88 high level of preservation of ultrastructure and fluorescence signals while simultaneously  
89 maintaining potent clearing capability (clearing-preservation spectrum). Of proliferating tissue  
90 clearing techniques, an aqueous tissue clearing method, *ScaleS*, occupies a distinctive position with  
91 its effective clearing-preservation spectrum (22). However, the clearing protocol of *ScaleS*,  
92 sequential 12 hr incubation in six solutions at 37°C, might lead to less-than-optimal preservation of  
93 ultrastructure. Although *ScaleSQ(0)* is formulated for rapid clearance of brain slices without lipid-  
94 extracting detergents, a considerable expansion in sample volume is observed after the treatment  
95 (22), potentially resulting in morphological artifacts. With the goal of minimizing processing time  
96 and changes in sample volume, we developed *ScaleSF* as an isometric and rapid clearing protocol by  
97 modifying the clearing procedure of *ScaleS* (Fig. 1).

98 The clearing protocol of *ScaleSF* requires the sequential incubation of brain slices in three  
99 solutions, *ScaleS0* solution, phosphate buffer saline (PBS), and *ScaleS4* solution, for a total of 10.5–  
100 14.5 hr (Fig. 1A). Cleared brain slices were embedded in agarose gel dissolved in *ScaleS4D25(0)*  
101 solution (*ScaleS4* gel) (23). *ScaleSF* treatment rendered 1-mm-thick mouse brain slices transparent  
102 with a similar degree of transparency as that yielded with *ScaleSQ(0)* (Fig. 1B and C). While a  
103 modest expansion in sample sizes was observed after *ScaleSQ(0)* treatment (linear expansion:  $110.7$   
104  $\pm 4.1\%$ ) (Fig. 1C and D), the final sizes of brain slices cleared with *ScaleSF* were approximately  
105 100% of that of the original (linear expansion:  $102.5 \pm 1.3\%$ ) (Fig. 1B and D) after transient  
106 shrinkage and expansion (Fig. S2A). The transmission curves of 1-mm-thick mouse brain slices  
107 showed that *ScaleSF* cleared brain slices in a manner comparable to *ScaleSQ(0)* (Fig. 1E). Although  
108 tissues cleared with the original *ScaleS* protocol can be stably stored in *ScaleS4* solution (22), brain  
109 slices cleared with *ScaleSF* gradually expanded during storage in the solution (Fig. S2B). This  
110 expansion could be controlled by embedding the slices in *ScaleS4* gel while still maintaining  
111 transparency of the cleared slices (Fig. S2B and C). Thus, *ScaleSF* is an isometric tissue clearing  
112 method with comparable clearing capability to that of *ScaleSQ(0)*.

113 The fluorescence preservation and clearing capability of *ScaleSF* were assessed with the  
114 brain slices of transgenic mice expressing somatodendritic membrane-targeted enhanced green  
115 fluorescent protein (EGFP) in PV-positive neurons (PV-FGL mice) (24). The three-dimensional  
116 image acquisition of slices collected from the cerebral cortex of the mice was performed with a  
117 confocal laser scanning microscope (CLSM) (Fig. 1F–J). The cleared brain slices were placed in a  
118 customizable 3D-printed chamber (Fig. S1). The high resolution of the three-dimensional image was  
119 demonstrated by *xy* images obtained at different depths (Fig. 1G–J): EGFP targeting of the  
120 somatodendritic plasma membrane was discernable even at the depths of 250  $\mu\text{m}$  and 750  $\mu\text{m}$  (Fig.  
121 1I and J), indicating the preservation of both fluorescence signals and membrane structures as well as  
122 potent clearing capability of *ScaleSF* technique.

123 Fixatives containing glutaraldehyde (GA) improve the preservation of ultrastructural  
124 morphology (25). However, it remains unclear how GA affects tissue clearing performance and  
125 ultrastructural preservation in optically cleared tissues. First, we tested the effects of GA on the  
126 clearing capability and isometricity of *ScaleSF*. Remarkably, *ScaleSF* treatment rendered GA-fixed  
127 brain slices transparent without the shrinkage or expansion of their final sizes, albeit less efficiently  
128 transparent in brain slices fixed with high concentrations of GA (1% and 2%) (Fig. 2A–C). Then, we  
129 examined the effects of GA on ultrastructural preservation in brain slices cleared with *ScaleSF* (Fig.  
130 3). To this end, *ScaleSF*-treated mouse brain slices that had been fixed with GA were restored by  
131 washing with PBS (*deScaling*) (26), and synaptic ultrastructure in the cerebral cortex was imaged by  
132 TEM. GA improved ultrastructural preservation even in the brain slices cleared with *ScaleSF* (Fig.

133 3A). Raising the concentration of GA in fixatives increased the membrane integrity of presynaptic  
134 and postsynaptic structures in the cleared slices (Fig. 3A<sub>1</sub>–A<sub>5</sub>). Scoring the ultrastructural  
135 preservation by the membrane continuity of presynaptic terminals demonstrated that, at its low  
136 concentration (0.02%), GA improved ultrastructural preservation in the cleared slices to an extent  
137 comparable to that in the control slices fixed with paraformaldehyde (PFA) (Fig. 3B). We also  
138 noticed that the clearing protocol of ScaleSF failed to fully preserve synaptic ultrastructure (Fig. 3,  
139 A<sub>6</sub>, A<sub>7</sub>, and B). The GA-mediated ultrastructural preservation was more dramatic in the brain slices  
140 obtained from marmosets (Fig. 3C). Without GA, the membrane integrity of the presynaptic and  
141 postsynaptic structures was severely degraded after clearing with ScaleSF (Fig. 3C<sub>1</sub> and C<sub>4</sub>). By  
142 contrast, ScaleSF-treated brain slices fixed with 4% PFA containing 0.2% or 1% GA showed nearly  
143 complete contiguous membrane integrity (Fig. 3C<sub>2</sub>–C<sub>6</sub>). We also found that an alternative epoxy  
144 resin and a different embedding method were compatible with ScaleSF-treated brain slices (Fig. S3).  
145 Collectively, these results indicate that ScaleSF is an isometric, rapid, and GA-resistant tissue  
146 clearing method that permits multi-scale LM/EM neuronal imaging.

147

### 148 ***APEX2/BT-GO reaction that enables the correlated imaging of a fluorescent protein and an*** 149 ***osmiophilic polymer in optically cleared tissues***

150 For efficient successive LM/EM imaging in cleared tissues, we designed a genetically  
151 encoded probe for correlative light and electron microscopy (CLEM) by fusing EGFP in tandem  
152 with an engineered ascorbate peroxidase, APEX2 (EGFP-APEX2) (27). APEX2 catalyzes the  
153 polymerization and local deposition of 3,3-diaminobenzidine (DAB) in the presence of hydrogen  
154 peroxidase, which subsequently recruits electron-dense osmium to produce EM contrast.  
155 Importantly, APEX2 retains its peroxidase activity even after fixation with GA (27-29). We used a  
156 single adeno-associated virus (AAV) vector Tet-Off platform, AAV-SynTetOff (30), for high-level  
157 and neuronal expression of the CLEM probe (AAV2/1-SynTetOff-EGFP-APEX2-BGHpA) (Fig.  
158 4A). We tested the feasibility of the vector by stereotactic injection into the mouse primary sensory  
159 cortex (S1). Seven to ten days after the injection, 1-mm-thick slices were prepared from the mouse  
160 brains and cleared with ScaleSF. Tissue sections were cut perpendicularly to the deScale slices (re-  
161 sectioning) and developed in the DAB-Ni<sup>2+</sup> solution (Fig. 4B). Unexpectedly, DAB-Ni<sup>2+</sup> labeling by  
162 APEX2 was much less sensitive than EGFP fluorescence-based detection in ScaleSF-treated  
163 sections, hampering the correlated fluorescent and bright field imaging (Fig. 4C). We reasoned that  
164 clearing with ScaleSF likely accounts for the lower sensitivity of APEX2, because DAB-Ni<sup>2+</sup>  
165 labeling with APEX2 correlated well with EGFP fluorescence in untreated sections (Fig. 4D). To  
166 resolve this problem, we designed an experimental procedure in which biotin molecules are  
167 deposited with tyramide signal amplification (TSA) reaction using its peroxidase activity of APEX2  
168 (APEX2/BT-GO reaction) prior to ScaleSF treatment and then re-sections prepared from the cleared  
169 slices are processed for ABC/DAB-Ni<sup>2+</sup> visualization (Fig. 4E). APEX2/BT-GO reaction gave  
170 remarkably strong DAB-Ni<sup>2+</sup> labeling even after ScaleSF treatment (Fig. 4F). DAB-Ni<sup>2+</sup> labeling  
171 with APEX2/BT-GO reaction was comparable to or even more sensitive than EGFP fluorescence in  
172 ScaleSF-treated sections (compare Fig. 4F<sub>1</sub> with F<sub>2</sub>). Remarkably, we further observed DAB-Ni<sup>2+</sup>  
173 labeling in fine subcellular structures such as axons, dendrites, and dendritic spines (Fig. 4F<sub>3</sub> and F<sub>4</sub>).  
174 Thus, APEX2/BT-GO reaction combined with high-level gene transduction by the AAV-SynTetOff  
175 platform permits the correlated imaging of a fluorescent protein and an osmiophilic polymer in brain  
176 slices cleared with ScaleSF.

177

### 178 ***Multi-scale LM/EM neuronal imaging in rodent and primate brains***

179 By combining the aforementioned techniques, we implemented the multi-scale LM/EM  
180 neuronal imaging of three brain-wide circuits of two different species, mouse striatofugal, mouse  
181 callosal, and marmoset corticostriatal projection systems.

182 The caudate-putamen (CPu) is the primary input structure of the basal ganglia (31); it  
183 receives glutamatergic afferents from the cerebral cortex and thalamus, and sends GABAergic  
184 efferents to the external segment of the globus pallidus (GPe), entopeduncular nucleus (EP), and  
185 substantia nigra (SN). The striatofugal projection system was thus used as a model to test the  
186 feasibility of the imaging. The workflows for the multi-scale LM/EM neuronal imaging of murine  
187 striatal circuitry are presented in Fig. 5A. Four weeks after the injection of the AAV2/1-SynTetOff-  
188 EGFP-APEX2-BGHpA vector into the mouse CPu, the brains were fixed with 4% PFA containing  
189 0.2% GA to improve ultrastructural preservation. Parasagittal slices (1-mm thick) were prepared  
190 from the brains, and biotin molecules were deposited with APEX2/BT-GO reaction. The slices were  
191 cleared with ScaleSF, and then macroscopic and mesoscopic neural circuit mapping was conducted  
192 by CLSM (Fig. 5B). After perpendicular re-sectioning of the imaged slices (dotted lines in Fig. 5B),  
193 high-resolution image stacks were collected to document the detailed morphologies of the labeled  
194 neurons (Fig. 5C<sub>1</sub>–C<sub>3</sub> and D<sub>1</sub>–D<sub>3</sub>). The imaged re-sections were processed for ABC/DAB-Ni<sup>2+</sup>  
195 reaction using the deposited biotin molecules by APEX2/BT-GO reaction and embedded in an epoxy  
196 resin (Fig. 5C<sub>4</sub> and D<sub>4</sub>). Ultrathin sections were prepared from the re-sections and imaged with TEM  
197 at a nanometer resolution (Fig. 5C<sub>5</sub>, C<sub>6</sub>, D<sub>5</sub>, and D<sub>6</sub>).

198 We first performed the multi-scale LM/EM neuronal imaging of a synaptic input to a striatal  
199 neuron and a synaptic output to the GPe (Fig. 5). CLSM imaging in a ScaleSF-treated brain slice  
200 clearly visualized the striatofugal projection system: EGFP-labeled fibers arising from the CPu  
201 extended caudally to the brainstem, forming dense terminal fields in the GPe and SN (Fig. 5B). We  
202 targeted a neuron in the dorsal CPu on the input side (Fig. 5C<sub>1</sub>–C<sub>4</sub>) and succeeded in performing EM  
203 imaging of the synaptic ultrastructure of the targeted dendrite (Fig. 5C<sub>5</sub> and C<sub>6</sub>). The striatopallidal  
204 pathway, GABAergic inhibitory connections between the CPu and GPe, was mapped in the ScaleSF-  
205 treated slice (Fig. 5B). A brain section from the imaged slice showed varicose axon arborization  
206 (Fig. 5D<sub>1</sub> to D<sub>3</sub>) of the labeled neurons in the GPe. Following ABC/DAB-Ni<sup>2+</sup> reaction (Fig. 5D<sub>4</sub>),  
207 axon terminals filled with the dark DAB precipitates were imaged with TEM (Fig. 5D<sub>5</sub> and D<sub>6</sub>). We  
208 observed a symmetric synapse, which is characterized by the absence of postsynaptic densities  
209 (PSDs) and the narrow synaptic cleft, on a dendrite of the GPe neuron (Fig. 5D<sub>6</sub>). We then  
210 performed the multi-scale LM/EM neuronal imaging of striatonigral fibers on another cleared slice  
211 (Fig. S4). Myelin is a protein-lipid bilayer sheath that extends from oligodendrocytes and Schwann  
212 cells. Although an immunofluorescence study shows the unmyelinated character of striatonigral  
213 fibers (32), there is no direct evidence that striatonigral fibers are unmyelinated by EM observation.  
214 We thus applied our multi-scale LM/EM neuronal imaging to examine whether striatonigral fibers  
215 are indeed unmyelinated. Brain sections at the level of medial forebrain bundle (MFB) were prepared  
216 from the imaged slice and processed for successive LM/EM imaging (Fig. S4B and C). Targeting  
217 axonal bundles near the optic tract (OT) (Fig. S4C<sub>1</sub> and C<sub>2</sub>), we found that almost all of the darkly  
218 stained axons were unmyelinated (Fig. S4C<sub>3</sub> and C<sub>4</sub>). We also applied the multi-scale neuronal  
219 imaging to GABAergic inhibitory synapses between striatal projection neurons and SN neurons (Fig.  
220 S4B and D). Beginning with the mapping of the striatonigral projection in the cleared slice (Fig.  
221 S4B), varicose axon arborization was visualized in a re-section at the level of SN (Fig. S4D<sub>1</sub>), and a  
222 DAB-labeled axon terminal forming a symmetric synapse with a dendritic process was successively  
223 imaged (Fig. S4D<sub>2</sub>–D<sub>4</sub>).

224 Multi-scale LM/EM neuronal imaging should be effective in large-brained animals such as  
225 primates. The marmoset is becoming increasingly popular as a model organism in neuroscience  
226 research because of its social cognitive abilities and amenability to genetic manipulation (33, 34).  
227 We demonstrated the applicability of our multi-scale neuronal imaging in marmoset brains (Fig. 6).

228 The AAV2/1-SynTetOff-EGFP-APEX2-BGHpA vector was injected into multiple neocortical sites  
229 of marmosets, and the brains were fixed with 4% PFA containing 0.2% GA. We identified clusters of  
230 neuronal elements visualized by EGFP-APEX2 expression in a macroscopic whole-brain image (Fig.  
231 6B). The brains were then cut into 1-mm-thick coronal slices and those containing injection sites  
232 were cleared with *Scale*SF (Fig. 6C). Neural circuit mapping with CLSM clearly visualized the  
233 corticostriatal projection in the cleared slice: EGFP-labeled axons arising from the S1 extended  
234 subcortically and formed a dense terminal field in the putamen (Fig. 6D–F). After *deScale*ing with  
235 PBS, the imaged slice was cut into sections for subcellular imaging with CLSM (Fig. 6G<sub>1</sub> and H<sub>1</sub>).  
236 High-resolution image stacks in the re-sections documented the detailed morphologies of labeled  
237 neurons: pyramidal-shaped somata, apical and basal dendrites emanating from somata, and axonal  
238 projections extending basally and horizontally in the S1 (Fig. 6G<sub>1</sub>–G<sub>3</sub>), and axon terminal  
239 arborization and axonal boutons in the putamen (Fig. 6H<sub>1</sub>–H<sub>3</sub>). Of these structures, we targeted a  
240 basal dendrite of a pyramidal neuron on the input side (arrows in Fig. 6G<sub>3</sub>) and a corticostriatal  
241 axonal bouton on the output side (arrows in Fig. 6H<sub>3</sub>) for subsequent EM imaging. Following  
242 ABC/DAB-Ni<sup>2+</sup> reaction and resin embedding (Fig. 6G<sub>4</sub> and H<sub>4</sub>), ultrathin sections were prepared  
243 from the re-sections and further processed for EM (Fig. 6G<sub>5</sub>, G<sub>6</sub>, H<sub>5</sub>, and H<sub>6</sub>). We observed an  
244 asymmetric synapse, which typically mediates glutamatergic neurotransmission, on the targeted  
245 dendrite filled with electron-dense DAB precipitates (Fig. 6G<sub>6</sub>), as well as an asymmetric synapse  
246 between a corticostriatal axon terminal and a striatal dendrite (Fig. 6H<sub>6</sub>). Given macroscopic imaging  
247 of centimeter-sized marmoset brains (3 cm length and 2 cm width; Fig. 6B) and TEM imaging of  
248 synapses with nanometer resolution (1.2 nm/pixel; Fig. 6G<sub>6</sub> and H<sub>6</sub>), we succeeded in multi-scale  
249 LM/EM neuronal imaging with over seven orders of magnitude.

250 Our multi-scale LM/EM imaging allows for high-speed LM imaging of substantial tissue  
251 volume at high-resolution and subsequent EM observation of targeted structures, facilitating the  
252 capture of scarce structures with nanoscale resolution. Callosal projection neurons are a  
253 heterogenous population of neocortical projection neurons that interconnect the two hemispheres of  
254 the cerebral cortex (35). Notably, callosal inputs onto GABAergic neocortical interneurons are scant:  
255 the vast majority of callosal terminals synapses onto dendritic spines, likely those of excitatory  
256 pyramidal neurons, while the remainder synapses onto dendritic shafts of spiny and aspiny neurons  
257 in mice (36, 37). We therefore chose callosal synaptic inputs onto a neocortical GABAergic  
258 interneuron subtype, PV neocortical interneurons, in mice as scarce structures with nanoscale  
259 resolution and tracked them in a targeted way across multiple spatial scales by successive LM/EM  
260 imaging (Fig. 7). The AAV2/1-SynTetOff-EGFP-APEX2-BGHpA vector was injected into the  
261 primary motor cortex (M1) and the AAV2/1-SynTetOff-FLEX-mScarlet-BGHpA was injected into  
262 the contralateral M1 of a *PV<sup>+/Cre</sup>* mouse to label callosal axons with EGFP and PV neocortical  
263 interneurons with mScarlet (Fig. 7A and B). CLSM imaging in a *Scale*SF-treated brain slice mapped  
264 the callosal projection system: EGFP-labeled axons arising from the M1 passed through the corpus  
265 callosum and projected to the homotopic contralateral cortex, where mScarlet-labeled PV  
266 interneurons were located (Fig. 7C and D). We screened a large number of (> 3000) serial *xy* images  
267 (121 × 121 μm square) at different *z* positions in a thick brain slice (1-mm thickness) cleared with  
268 *Scale*SF and identified an apposition between a callosal axon terminal and a dendrite of PV  
269 neocortical interneuron (Fig. 7E, arrowhead). After re-sectioning the imaged slices parallel to the *xy*  
270 plane (parallel re-sectioning) followed by counterstaining with DAPI (4',6-diamidino-2-  
271 phenylindole), the possible synaptic contact was validated with high-resolution imaging with CLSM  
272 (Fig. 7F, arrowheads). Following ABC/DAB-Ni<sup>2+</sup> reaction and resin embedding, the re-section was  
273 subjected to FIB-SEM imaging (Fig. 7G–I and Movie S1). The CLSM image in the slice exactly  
274 matched the FIB-SEM tomogram (compare Fig. 7E with H): mScarlet fluorescence corresponded  
275 with the SEM profile of membrane structure, and EGFP fluorescence correlated well with the DAB-  
276 Ni<sup>2+</sup> precipitates. Correlation of CLSM in the *Scale*SF-treated brain slice, CLSM in the re-section,  
277 and FIB-SEM datasets demonstrated the preservation of structural integrity throughout successive

278 LM/EM imaging (Fig. 7C–I). The axodendritic apposition between a callosal axon and a PV  
279 neocortical interneuron (Fig. 7E and F, arrowheads) actually formed a synaptic contact: we observed  
280 an asymmetric synaptic specialization, which is characterized by the existence of PSD, at the  
281 apposition between the axon terminal filled with electron-dense DAB precipitates and the dendrite in  
282 a FIB-SEM tomogram (Fig. 7I).

## 283 Discussion

284 The imaging scale required for deciphering brain-wide connectivity in the mammalian brain  
285 exceeds several orders of magnitude (3). We overcame the technical challenges associated with this  
286 requirement by coupling a tissue clearing method with successive LM/EM imaging. Our multi-scale  
287 LM/EM neuronal imaging enables brain-wide connectomic analysis by the simultaneous  
288 interrogation of their neural circuit structures with LM and synaptic connectivity with EM. The  
289 feasibility of the multi-scale neuronal imaging was demonstrated in the mouse striatofugal projection  
290 system. Beginning with mapping the projection in cleared brain tissues, we anterogradely imaged the  
291 detailed morphologies of labeled neurons with CLSM and targeted nanoscopic structures such as  
292 synapses and myelin sheaths (Fig. 5 and Fig. S4). As demonstrated by the application to marmoset  
293 brains (Fig. 6), our multi-scale imaging should be effective in connectomic analysis of large-brained  
294 animals. Our multi-scale LM/EM imaging that is featured with high-speed and high-resolution LM  
295 imaging followed by subsequent EM imaging at a nanometer resolution allowed us to capture scarce  
296 synaptic contacts, callosal inputs onto PV neocortical interneurons in mice (Fig. 7). Our multi-scale  
297 LM/EM imaging can complement current comprehensive connectomic analysis (4, 5). While current  
298 comprehensive approaches with EM alone are mainly applied to small pieces of brain tissues (6-9),  
299 the present imaging modality makes it possible to describe synaptic connectivity of brain-wide  
300 circuits by integrating seamlessly structural information with different spatial scales in a reasonable  
301 amount of time without specialized equipment.

302 Sca/eSF, a rapid, isometric, and GA-resistant tissue clearing technique, facilitated multi-scale  
303 LM/EM neuronal imaging. Multi-scale LM/EM imaging requires a tissue clearing method that  
304 allows for the preservation of ultrastructure and fluorescence signals. However, most tissue clearing  
305 methods, especially protocols featuring high clearing capabilities, aggressively remove lipids and  
306 pigments for extensive tissue clarification (15, 16), compromising ultrastructural preservation (22,  
307 38) (but see ref. (39)). Compared to solvent and hydrogel-based tissue clearing methods, aqueous  
308 tissue clearing methods surpass in preserving fluorescence signals and tissue integrity (15, 16).  
309 Although aqueous tissue clearing methods containing minimal lipid-extracting detergents have been  
310 reported (15, 16), none are suitable for use with our multi-scale LM/EM imaging, i.e., isometricity,  
311 resistance against GA, and a clearing capability for 1-mm-thick brain slices. The 1-mm thickness of  
312 the brain slices used in this study is satisfactory enough to recover all of dendritic arbors and  
313 inhibitory interneuron axonal arbors of the rodent and carnivore cerebral cortex in their entirety (40,  
314 41), providing rich structural information on neural circuit architecture.

315 Although Sca/eSF achieved a high level of preservation of ultrastructure and fluorescence  
316 signals (Fig. 1–3), two challenges remain in the clearing protocol. First is the advanced preservation  
317 of ultrastructure: a slight but statistically significant degradation of the ultrastructure in brain slices  
318 cleared with Sca/eSF (Fig. 3B) leaves a room for further improvement. Second is the scaling of the  
319 clearing protocol: Sca/eSF was developed for clearing brain slices, not for a whole brain. Although  
320 1-mm-thick brain slices provide good knowledge of dendritic and local axonal arbors, information  
321 about long-range projections is fragmentary and incomplete in the slice (12, 13, 41-43). The direct  
322 perfusion of clearing reagents that enhances clearing capability (44-46) might permit whole-brain  
323 clearing accompanied with preserved ultrastructure and fluorescence signals.

324 Successive LM/EM imaging can be performed efficiently with fluorescent and electron-dense  
325 genetically encoded CLEM probes. LM/EM dual labeling with a single protein enables the  
326 unambiguous correlation of LM and EM datasets. Although the correlation can be achieved by  
327 endogenous and artificial landmarks, these techniques require additional labeling for endogenous  
328 landmarks and/or specialized equipment (47-49). Genetically encoded CLEM probes for our multi-  
329 scale LM/EM neuronal imaging should be stable in cleared samples. APEX2 retains its peroxidase  
330 activity even upon fixation with GA (27-29), rendering APEX2 fusion constructs with fluorescent



331 proteins as good candidates for the CLEM probes. However, we found that its peroxidase activity of  
332 APEX2 was unexpectedly low after clearing with *Scale*SF (Fig. 4C and D). Hence, we introduced  
333 APEX2/BT-GO reaction prior to the clearing treatment to deposit biotin molecules with TSA  
334 reaction using its peroxidase activity of APEX2 (Fig. 4E). APEX2/BT-GO reaction provided  
335 remarkably strong DAB-Ni<sup>2+</sup> labeling while maintaining EGFP fluorescence (Fig. 4F) that achieved  
336 LM/EM dual labeling in brain slices even cleared with *Scale*SF. Despite the potent LM/EM dual  
337 labeling with APEX2 BT-GO reaction, the reaction itself and permeabilization with a lipid-  
338 extracting detergent can potentially damage cellular ultrastructure. Our LM/EM dual labeling  
339 coupling a genetically encoded CLEM probe, EGFP-APEX2, with APEX2/BT-GO reaction gave  
340 strong EM contrast throughout the cytoplasm (Fig. 5–7 and Fig. S4). Although cytoplasmic labeling  
341 with DAB facilitates the identification of targeted structures, the labeling may interfere with the  
342 visualization of ultrastructural features of synapses such as active zone, synaptic vesicle  
343 morphologies, and PSDs. Peroxidase constructs targeted to subcellular compartments would make it  
344 possible to visualize ultrastructural properties of synaptic arrangements as well as multiplexed  
345 labeling in EM (50).

346 The simultaneous interrogation of molecular and structural information is required for the  
347 advancement of connectomic analysis. However, molecular information is often lost in connectomic  
348 analysis with EM alone, and LM lacks nanoscale resolution necessary to identify a single synapse.  
349 Our multi-scale LM/EM neuronal imaging overcomes the deficiency of both analyses. *Scale*  
350 technologies achieve stable tissue preservation for immunohistochemical labeling on re-sections  
351 prepared from de*Scale*d tissues (K. Y. and H. H., unpublished observations) (22, 26) and can thus be  
352 used to collect both molecular and structural information. Furthermore, our labeling approach with  
353 genetically encoded probes can be applied to a library of Cre driver lines, providing us with a genetic  
354 handle on studying neural circuit structure and synaptic connectivity of specific neuronal types.  
355 Indeed, we identified and tracked mouse callosal inputs onto a neocortical GABAergic interneuron  
356 subtype, PV neocortical interneurons, by injecting a flexed AAV vector coding for mScarlet into  
357 *PV<sup>+</sup>/Cre* mouse brains (Fig. 7). The high-level preservation of fluorescent signals and ultrastructure in  
358 *Scale*SF-treated brain slices (Fig. 1–3) is amenable to *post hoc* molecular mapping with high  
359 accuracy on re-sections, such as array tomography (51) and super-resolution imaging (17).

360 In summary, we developed and validated multi-scale LM/EM neuronal imaging for  
361 connectomic analysis of neuronal circuits spanning the mammalian brain. Our imaging modality will  
362 significantly advance the understanding of brain-wide connectivity by expanding the scales of  
363 objects.

## 364 **Materials and Methods**

### 365 **Animals**

366 All animal experiments involving animal care, surgery, and sample preparation were  
367 approved by the Institutional Animal Care and Use Committees of Osaka University (Approval No.  
368 300150), Juntendo University (Approval No. 2020087, 2020088), and Kyoto University (Approval  
369 No. Med Kyo 20031) and conducted in accordance with Fundamental Guidelines for Proper Conduct  
370 of Animal Experiments by the Science Council of Japan (2006). All efforts were made to minimize  
371 animal suffering and the number of animals used.

372 Eight- to twelve-week-old male C57BL/6J (Nihon SLC), *PV<sup>Cre</sup>* heterozygous (*Pvalb<sup>tm1(cre)Arbr</sup>*,  
373 The Jackson Laboratory Stock No: 008069) (52), and PV/myristoylation-EGFP-low-density  
374 lipoprotein receptor C-terminal BAC transgenic mice (PV-FGL mice) (24) under specific pathogen-  
375 free (SPF) conditions were used. The mice were maintained under a 12/12 hr light/dark cycle (light:  
376 08:00–20:00) with ad libitum access to food and water. Mouse genotypes were determined by  
377 polymerase chain reaction (PCR) analysis as described previously (24).

378 Four young adult (14–15 months old) male or female common marmosets (*Callithrix jacchus*;  
379 body weight, 280–400 g; bred either in CLEA Japan or in our laboratory) were housed in their home  
380 cages under a 14/10 hr light/dark cycle (light: 07:00–21:00). Each cage had a wooden perch, a food  
381 tray, and an automatic water dispenser. The animals were fed twice a day with solid food (CMS-1,  
382 CLEA Japan). Water was provided ad libitum.

383

### 384 **Preparation of tissue slices**

385 Mice were deeply anesthetized by an intraperitoneal injection of sodium pentobarbital (200  
386 mg/kg; Somnopentyl, Kyoritsu Seiyaku) and perfused transcardially with 20 mL of 5 mM  
387 phosphate-buffered 0.9% saline (PBS; pH 7.4) at 4°C, followed by the same volume of 4%  
388 paraformaldehyde (PFA) (1.04005.1000, Merck Millipore) or 4% PFA containing various  
389 concentrations (0.02, 0.2, 1 or 2%) of glutaraldehyde (GA) (17003-92, Nacalai Tesque) in 0.1 M  
390 phosphate buffer (PB; pH 7.4) at 4°C. The brains of the animals were removed and postfixed in the  
391 same fixatives overnight at 4°C. After embedding in 4% agar (01028-85, Nacalai Tesque) in PBS,  
392 coronal or sagittal slices of 1-mm in thickness were cut with a vibrating tissue slicer (Linear PRO7N,  
393 Dosaka EM).

394 The marmosets were deeply anesthetized by an intramuscular injection of ketamine (60  
395 mg/kg; Ketalar, Daiichi Sankyo Propharma) and an intraperitoneal injection of sodium pentobarbital  
396 (80 mg/kg). The fixation and preparation of the tissue slices of marmoset brains were the same as  
397 those used for the mice, except that their perfusion with 300 mL of 1.0 unit/mL heparin (224122458,  
398 Mochida Pharmaceutical) in PBS followed by the same volume of 4% PFA or 4% PFA containing  
399 GA (0.2% or 1%) in 0.1 M PB.

400

### 401 **Tissue clearing**

402 The schedule for tissue clearing with ScaleSF is described in Fig. 1A. Brain slices were  
403 permeabilized with ScaleS0 solution for 2 hr at 37°C, washed twice with PBS(–) (27575-31, Nacalai  
404 Tesque) for 15 min at 20–25°C, and cleared with ScaleS4 solution for 8–12 hr at 37°C. We treated  
405 brain slices with ScaleS4 solution for 12 hr in the data shown in this paper. The formula for ScaleS0  
406 solution was 20% (w/v) sorbitol (06286-55, Nacalai Tesque), 5% (w/v) glycerol (G9012, Sigma-  
407 Aldrich), 1 mM methyl-β-cyclodextrin (M1356, Tokyo Chemical Industry), 1 mM γ-cyclodextrin  
408 (037-10643, Wako Pure Chemical Industries), and 3% (v/v) Dimethyl Sulfoxide (DMSO) (13407-

409 45, Nacalai Tesque) in PBS(-), and that for ScaleS4 solution was 40% (w/v) sorbitol, 10% (w/v)  
410 glycerol, 4 M urea (35940-65, Nacalai Tesque), 0.2% (w/v) Triton X-100 (35501-15, Nacalai  
411 Tesque), and 25% (v/v) DMSO in distilled deionized water(23).

412 Optical clearing of brain slices with ScaleSQ(0) was performed as described previously (22).

413

### 414 ***Observation and measurement of macroscopic structures***

415 Transmission images of mouse brain slices were acquired with a stereomicroscope (M205C,  
416 Leica Microsystems) equipped with a 1× objective lens (PLANAPO, working distance [WD] = 65  
417 mm, Leica Microsystems), a transmitted light base (TL RCI™, Leica Microsystems), and a digital  
418 single lens reflex camera (D7200, Nikon). Marmoset brain slices were placed on a LED tracing  
419 board (A4-500, Trytec) and imaged with the digital single lens reflex camera mounted on a copy  
420 stand (CS-A4 L18142, LPL). Fluorescence images of the marmoset brains were acquired with the  
421 stereomicroscope equipped with an external fluorescence light source (EL6000, Leica  
422 Microsystems), a GFP filter cube (excitation filter:  $470 \pm 20$  nm, emission filter:  $525 \pm 25$  nm, Leica  
423 Microsystems), and a cooled CCD camera (Rolera-XR, QImaging). Brain samples were placed on  
424 graph paper with a patterned background (ruled into 1-mm squares).

425 To assess tissue expansion or shrinkage caused by tissue clearing, brain-slice areas were  
426 measured with ImageJ (ver. 1.52v, National Institutes of Health) (53). Linear expansion values were  
427 determined based on the square root of the changes in brain-slice areas.

428

### 429 ***Transmission measurements***

430 Light transmittance of brain slices was determined with a spectrofluorometer (Enspire 2300,  
431 Perkin Elmer). Coronal brain slices at the level of the S1 were used. Brain slices cleared with  
432 ScaleSF or ScaleSQ(0), or stored in PBS(-) were transferred onto UV transparent 96-well plates  
433 (655801, Greiner Bio-One) to measure absorbance of the tissues. The absorbance (A) was converted  
434 to percent transmittance (%T) using an equation derived from Lambert-Beer's law:  $A = 2 - \log_{10}$   
435 (%T).

436

### 437 ***Imaging chamber and tissue mounting***

438 A customizable 3D-printed imaging chamber that enabled the reliable mounting of cleared  
439 tissues was designed for imaging with CLSM (Fig. S1). The chamber consisted of the chamber  
440 frame, bottom coverslip, and microscope stage adaptors (Fig. S1A). The frames and adaptors were  
441 designed according to the size and thicknesses of brain slices and ordered to be printed from a rigid  
442 acrylic resin, AR-M2 (Keyence), using a 3D-printer (AGILISTA-3200, Keyence) by DMM.make  
443 (<https://make.dmm.com>). The frames were glued to the bottom coverslips (Matsunami). Optically  
444 cleared tissues were mounted on the coverslips and embedded in 1.5% Agarose (L03, TaKaRa Bio)  
445 in ScaleS4D25(0) solution (ScaleS4 gel) (23). Tissues were coverslipped and left at 4°C until the gel  
446 solidified. The imaging chambers were attached to the microscope stage adaptors to mount on  
447 microscope stages (Fig. S1B and C) or attached to petri dishes with Blu-Tak® (Bostik) and  
448 immersed in ScaleS4 solution (Fig. S1D).

449

### 450 ***Confocal laser scanning microscope***

451 3D image stacks were acquired with a TCS SP8 CLSM (Leica Microsystems). A 16× multi-  
452 immersion objective lens (HC FLUOTAR 16x/0.60 IMM CORR VISIR, numerical aperture [NA] =

453 0.60, WD = 2.5 mm, Leica Microsystems) was used for imaging the optically cleared brain slices (1-  
454 mm thick). A 10× air (HCX PL APO 10x/0.40 CS, NA = 0.40, WD = 2.20 mm, Leica  
455 Microsystems), a 20× multi-immersion (HC PL APO 20x/0.75 IMM CORR CS2, NA = 0.75, WD =  
456 0.68 mm, Leica Microsystems), a 25× water-immersion (HC FLUOTAR L 25x/0.95 W VISIR, NA  
457 = 0.95, WD = 2.50 mm, Leica Microsystems), and a 63× oil-immersion (HC PL APO 63x/1.40 Oil  
458 CS2, NA = 1.40, WD = 0.14 mm, Leica Microsystems) objective lenses were used for imaging the  
459 sections (40- or 50-μm thick). Sections were mounted with PBS or 75% glycerol in PBS (29). DAPI,  
460 EGFP, and mScarlet were excited by 405-, 488-, and 552-nm lasers, and their fluorescence was  
461 collected through 410–480, 495–525, and 560–700 nm emission prism windows, respectively.

462

### 463 ***Transmission electron microscopy***

464 Sample preparation and imaging of the cleared brain slices with TEM were carried out as  
465 described previously (22), with minor modifications. Briefly, 1-mm-thick brain slices were cleared  
466 with ScaleSF and embedded in ScaleS4 gel for 24 hr or stored in PBS(–) at 4°C. 1-mm-cubes were  
467 excised from the brain slices with carbon steel blades (FA-10B, Feather). The cubes and re-sections  
468 (50-μm thick) prepared from 1-mm-thick slices were osmicated with 1% OsO<sub>4</sub> (25746-06, Nacalai  
469 Tesque) in 0.1 M PB, dehydrated with a gradient series of ethanol (50, 70, 90, 99, and 100%)  
470 followed by propylene oxide (29223-55, Nacalai Tesque), and embedded in an Epon 812 mixture (a  
471 mixture of Luveak-812 [20829-05, Nacalai Tesque], Luveak-DDSA [14423-95, Nacalai Tesque],  
472 Luveak-MNA [14424-85, Nacalai Tesque], and Luveak-DMP-30 [14425-75, Nacalai Tesque]) or  
473 Durcupan (44610, Sigma-Aldrich). To test the accelerator Luveak-DMP-30 for the permeability of  
474 the Epon 812 mixture into the tissues, resin-polymerization was initiated after pre-incubation with an  
475 Epon 812 mixture that did not contain the accelerator (modified Epon method). After polymerization  
476 of the resin, ultrathin sections (70-nm thick) were cut with an ultramicrotome (Ultracut UCT, Leica  
477 Microsystems). The sections were stained with 1% uranyl acetate and 1% lead citrate, and were  
478 observed under a TEM (H-7650, Hitachi) at 80 kV. We acquired digital photographs of presynaptic  
479 axonal terminals, which contained synaptic vesicles and synapsed with dendritic structures, at a  
480 resolution of 1.2 nm/pixel.

481 To evaluate ultrastructural preservation, the plasma membrane of the presynaptic structures  
482 was outlined with a graphic software (CANVAS X DRAW, ACD systems). Membrane continuities  
483 of presynaptic structures of > 90%, 50–90%, 10–50%, and < 10% were scored as 4, 3, 2, and 1,  
484 respectively.

485

### 486 ***Scanning electron microscopy combined with focused ion beam***

487 We also performed 3D imaging of synaptic structures by FIB-SEM technique as described  
488 previously (54), with minor modifications. In brief, brain sections (50-μm thick) were osmicated  
489 with 2% OsO<sub>4</sub> in 0.1 M PB, counterstained with 1% uranyl acetate for 2 hr, and stained in lead  
490 aspartate solution at 60°C for 30 min. After dehydration with a gradient series of ethanol (60, 70, 80,  
491 90, 99, and 100%) and propylene oxide, the sections were flat-embedded in the Epon 812 mixture.  
492 The regions that contained targeted structures were excised by carbon steel blades from the  
493 embedded sections, mounted on aluminium stubs, and examined with a FIB-SEM system  
494 (Crossbeam 540, Carl Zeiss Microscopy). Using the FIB of 30 kV and 3 nA, a surface layer of 10-  
495 nm thickness was milled at each sectioning. Following the removal of each layer, the freshly exposed  
496 surface was imaged with the SEM using the back-scattered electron detector at a magnification of 10  
497 nm/pixel. The acceleration voltage of the imaging beam was 1.5 kV with a beam current of 1 nA and  
498 a dwell time of 13.6 μs/pixel.

499

## 500 *AAV vector construction and production*

501 pAAV2-SynTetOff-EGFP-APEX2-BGHpA was constructed as follows. The GFP sequence  
502 of pENTR1A-SV40LpA-tTAad-SYN-insulator-TRE-GFP-BGHpA (30) was replaced with a  
503 multiple cloning site, which contained BamHI-BglIII-SalI restriction sites. The resultant entry vector  
504 pENTR1A-SV40LpA-tTAad-SYN-insulator-TRE-BBS-BGHpA, namely pENTR1A-SynTetOff-  
505 BBS-BGHpA, was reacted with pAAV2-DEST(f) (30) by homologous recombination with LR  
506 clonase II (11791020, Thermo Fisher Scientific) to generate pAAV2-SynTetOff-BBS-BGHpA. A  
507 DNA fragment encoding EGFP-APEX2 fusion protein was generated by overlapping PCR. A  
508 sequence coding for a peptide linker (Gly-Gly-Ser)<sub>2</sub> was inserted between the two protein domains.  
509 The coding sequence of APEX2 was amplified from pcDNA3-Connexin43-GFP-APEX2 (#49385,  
510 Addgene) (27). The restricted products were inserted into pAAV2-SynTetOff-BBS through the  
511 BamHI/SalI sites, resulting in pAAV2-SynTetOff-EGFP-APEX2-BGHpA. For the construction of  
512 pAAV2-SynTetOff-FLEX-mScarlet-BGHpA, the coding sequence of mScarlet was amplified from  
513 pmScarlet\_C1 (#85042, Addgene) (55). The amplified products were inserted into pBSIISK-hFLEX  
514 (30) through the PstI/EcoRI sites to generate pBSIISK-FLEX-mScarlet. The pBSIISK-FLEX-  
515 mScarlet was then digested with BamHI/SphI and ligated into the corresponding sites of pAAV2-  
516 SynTetOff-BBS, yielding pAAV2-SynTetOff-FLEX-mScarlet-BGHpA. The following primers were  
517 used for the PCR amplification: BamHI-kozak-EGFP: 5'-  
518 AAAAGGATCCGCCACCATGGTGAGCAAGGG-3', EGFP-(GGG)<sub>2</sub>: 5'-  
519 GGAACCACCGGAACCACCCTTGTACAGCTCGTCCATGC-3', (GGG)<sub>2</sub>-APEX2: 5'-  
520 GGTGGTTCCGGTGGTTCCGGAAAGTCTTACCCAACTGT-3', SalI-APEX2: 5'-  
521 TTTTGTCTGACTTAGGCATCAGCAAACCCAA-3', PstI-kozak-mScarlet: 5'-  
522 AAAACTGCAGATGGTGAGCAAGGGCGAGGC-3', and mScarlet-stop-EcoRI: 5'-  
523 TTTTGAATTCTTACTTGTACAGCTCGTCCATGC-3'.

524 AAV vector particles were produced and purified as described previously (30). Briefly,  
525 pAAV2-SynTetOff-EGFP-APEX2-BGHpA or pAAV2-SynTetOff-FLEX-mScarlet-BGHpA and  
526 two helper plasmids were co-transfected into HEK293T cells (RCB2202, Riken) using  
527 polyethylenimine (23966, Polysciences). Virus particles were purified from the cell lysate or the cell  
528 lysate and supernatant by ultracentrifugation with OptiPrep (1114542, Axis-Shield) and concentrated  
529 by ultrafiltration with Amicon Ultra-15 (UFC905024, Merck Millipore). The infectious titer of the  
530 AAV vector (IFU/mL) was determined by quantitative PCR (qPCR) with HEK293T cells infected  
531 with the purified AAV vectors. The physical titer of the AAV vector (genome copies (gc)/mL) was  
532 measured by qPCR with the purified viral solutions. The solution was stored in aliquots at -80°C  
533 until use.

534

## 535 *Virus injection*

536 Virus injection into mouse brains was carried out as described previously, with some  
537 modifications (56, 57). Briefly, mice were deeply anesthetized with an intraperitoneal injection of  
538 medetomidine (0.3 mg/kg; Domitor, Zenocq), midazolam (4 mg/kg; Dormicum, Astellas Pharma),  
539 and butorphanol (5 mg/kg; Vetorphal, Meiji Seika Pharma) and placed in a stereotaxic apparatus  
540 (SR50, Narishige). Subsequently, 0.2 µl of the viral solution (AAV2/1-SynTetOff-EGFP-APEX2-  
541 BGHpA:  $1.32 \times 10^{11}$  IFU/mL, AAV2/1-SynTetOff-FLEX-mScarlet-BGHpA:  $1.8 \times 10^{13}$  gc/mL) was  
542 pressure injected into the M1, S1, and CPu through a glass micropipette attached to Picospritzer III  
543 (Parker Hannifin). The injection coordinates were as follows: M1: 1.0 mm anterior to the bregma,  
544 1.2 mm lateral to the bregma, and 0.8 mm ventral to the brain surface; S1: 2.0 mm lateral to the  
545 bregma, 0.5 mm ventral to the brain surface; and CPu: 0.5 mm anterior to the bregma, 2.0 mm lateral  
546 to the bregma, and 2.5 mm ventral to the brain surface. The mice were recovered from anesthesia

547 with an intraperitoneal injection of atipamezole (1.5 mg/kg; Antisedan, Zenoaq) and maintained  
548 under regular health checks for one to six weeks.

549 Virus injection into marmoset brains was performed as described previously (58). All  
550 surgical procedures were conducted under aseptic conditions. Animals were anesthetized with  
551 intramuscular injections of ketamine (15 mg/kg) and medetomidine (50 µg/kg) and pre-medicated  
552 with intramuscular injections of atropine (40 µg/kg; Nipro ES Pharma), ampicillin (25 mg/kg;  
553 Viccillin, Meiji Seika pharma), and dexamethasone (80 µg/kg; Decadron, Aspen Japan), as well as a  
554 subcutaneous injection of a lactated Ringer's solution (10 mL/kg; Solulact, Terumo) at 37°C. The  
555 animals were placed under deep anesthesia with isoflurane (1–2% in oxygen, Pfizer) inhalation. The  
556 head was fixed to a stereotaxic apparatus (SR-6C-HT, Narishige). Heart rate, pulse oxygen (SpO<sub>2</sub>),  
557 and rectal temperature were continuously monitored. A small hole was made in the skull with a  
558 dental drill. A glass micropipette with a tip diameter of 50 µm was filled with the viral solution  
559 (AAV2/1-SynTetOff EGFP-APEX2-BGHpA,  $1.32 \times 10^{11}$  IFU/mL). After incision of the dura, the  
560 pipette was slowly lowered to the target depth and fixed for 3 min. 0.15 µl of the viral solution was  
561 injected at a rate of 75 nl/min with a microsyringe pump (Legato 130, KD Scientific). The  
562 micropipette was held in place for 5 min and then extracted. The injection coordinates were as  
563 follows: 9.25 mm, 8.2 mm, 7.2 mm, and 6.15 mm anterior to the interaural line, 5.0 mm lateral to the  
564 midline, and 1.0 mm ventral to the brain surface. After the topical administration of gentamicin  
565 (Nichi-Iko Pharmaceutical), the head skin was closed by suturing. The animals were then received  
566 intramuscular injections of dexamethasone (80 µg/kg), diclofenac sodium (1.0 mg/kg,  
567 11147700J1057, Novartic Japan), and ampicillin (25 mg/kg), as well as a subcutaneous injection of  
568 lactated Ringer's solution (10 mL/kg) at 37°C. After surgery, the animals were recovered from  
569 anesthesia with an intramuscular injection of atipamezole (40 to 480 µg/kg), and ampicillin was  
570 administered for two days (25 mg/kg/day). The animals were maintained under regular health checks  
571 for six weeks.

572

### 573 *DAB-Ni<sup>2+</sup> labeling by APEX2*

574 The effects of Sca/eSF clearing on its peroxidase activity of APEX2 were assessed by the  
575 polymerization of DAB. The brains were fixed with 4% PFA containing 0.2% GA seven to ten days  
576 after the injection of the AAV2/1-SynTetOff-EGFP-APEX2-BGHpA vector into the S1. The brain  
577 slices (1-mm thick) expressing EGFP-APEX2 fusion proteins were cleared with Sca/eSF. EGFP  
578 fluorescence in the slices was examined under the fluorescence stereomicroscope. After deSca/eSF  
579 with PBS(-), the slices were cryoprotected in 30% sucrose in 0.1 M PB at 4°C, embedded in OCT  
580 compound (4583, Sakura Finetek), and frozen in liquid nitrogen-cooled isopentane. The slices were  
581 cut into 40-µm-thick sections on a freezing microtome (SM2000R, Leica Microsystems). Following  
582 CLSM imaging, the sections were permeabilized with PBS containing 0.3% Triton X-100 (0.3%  
583 PBS-X) and developed in 0.05% DAB·4HCl (347-00904, Dojindo), 25 mM nickel ammonium  
584 sulfate (24217-82, Nacalai Tesque), and 0.0003% H<sub>2</sub>O<sub>2</sub> in 50 mM Tris-HCl (pH 7.6) (DAB-Ni<sup>2+</sup>  
585 solution).

586

### 587 *DAB-Ni<sup>2+</sup> labeling by APEX2/BT-GO reaction*

588 DAB polymerization in brain slices cleared with Sca/eSF was enhanced with APEX2/BT-GO  
589 (biotinylated tyramine-glucose oxidase) reaction, in which biotin molecules were deposited with  
590 tyramide signal amplification (TSA) reaction using its peroxidase activity of APEX2. Brains were  
591 fixed with 4% PFA containing 0.2% GA and cut into 1-mm-thick slices. The expression of EGFP-  
592 APEX2 in brain slices was examined as described above. The slices were then permeabilized for 4 hr  
593 with 0.2% PBS-X containing 2% bovine serum albumin (BSA) (01863-77, Nacalai Tesque), washed

594 thrice with 0.1 M PB, and incubated for 4 hr in a BT-GO reaction mixture that contained 25  $\mu$ M  
595 biotinylated tyramine and 3  $\mu$ g/mL glucose oxidase (16831-14, Nacalai Tesque) (42, 57, 59). TSA  
596 reaction was initiated by adding 2 mg/mL of  $\beta$ -D-glucose (16804-32, Nacalai Tesque) into the  
597 reaction mixture and it proceeded for 2 hr. The brain slices were washed with PBS(-), fixed with 4%  
598 PFA in 0.1 M PB overnight at 4°C, and cleared with ScaleSF. Cryosections (40- or 50- $\mu$ m thick) or  
599 vibratome sections (50- $\mu$ m thick) were prepared from deScaled slices as described above. Some of  
600 the sections were counterstained with DAPI (1  $\mu$ g/ml, D1306, Thermo Fisher Scientific) in PBS for  
601 2 hr on ice. The sections were then reacted with avidin-biotinylated peroxidase complex (ABC) (1:50  
602 diluted in PBS, PK-6100, Vector Laboratories) in PBS containing 2% BSA overnight at 4°C and  
603 developed in DAB-Ni<sup>2+</sup> solution on ice. CLSM imaging was performed prior to the ABC reaction.

604

### 605 ***Bright-field microscopy***

606 Bright-field images of tissue sections were obtained with a light microscope (BX-51,  
607 Olympus) equipped with dry objectives (10 $\times$  UPlanApo, NA = 0.40, WD = 3.1 mm, Olympus; 40 $\times$   
608 UPlanApo, NA = 0.85, WD = 0.2 mm, Olympus) and a CCD camera (DP72 or DP74, Olympus).  
609 DAB-Ni<sup>2+</sup>-labeled sections were mounted onto glass slides (Superfrost micro slide glass APS-  
610 coated, Matsunami Glass) and coverslipped with 50% glycerol, 2.5% 1,4-diazabicyclo[2.2.2]octane  
611 (DABCO) (049-25712, Wako Pure Chemical Industries), and 0.02% sodium azide (31233-55,  
612 Nacalai Tesque) in PBS.

613

### 614 ***Image processing***

615 Three-dimensional renderings of CLSM image stacks were created with Imaris software (ver.  
616 9.0.0, Bitplane). Images appearing in Fig. 1F–J were deconvoluted with Huygens Essential software  
617 (ver. 18.10.0p8, Scientific Volume Imaging) before the rendering process. Maximum intensity  
618 projection and orthogonal images were created using Leica Application Suite X (LAS X, ver.  
619 3.5.5.19976, Leica Microsystems) and Imaris software. Three-dimensional reconstruction of FIB-  
620 SEM datasets was conducted using Dragonfly software (ver. 2020.2.0.941, Object Research System).  
621 The global brightness and contrast of the images were adjusted with ImageJ, Adobe Photoshop CS6  
622 (Adobe), and CANVAS X DRAW.

623

### 624 ***Statistical analysis***

625 Data are represented as means  $\pm$  standard deviations (SDs). The exact values of n are  
626 indicated in the corresponding figure legends. For comparisons between groups, unpaired Student's  
627 t-test was used (Fig. 1D). For comparisons among independent groups, one-way analysis of variance  
628 (ANOVA) (Fig. 2B), Kruskal–Wallis test followed by Steel–Dwass *post hoc* test (Fig. 3B), or  
629 Kruskal–Wallis test (Fig. S3C) was used. For comparisons between groups over time, two-way  
630 repeated measures ANOVA followed by Tukey *post hoc* test was used. The equality of probability  
631 distributions was assessed using Kolmogorov–Smirnov test. All tests were two-sided. Statistical  
632 analyses were conducted using EZR (ver. 1.41, Saitama Medical Center, Jichi Medical University)  
633 (60) and GraphPad Prism 8 (GraphPad Software). Statistical significance was set at  $P < 0.05$ .

634 **References**

- 635 1. O. Sporns, G. Tononi, R. Kötter, The human connectome: A structural description of the  
636 human brain. *PLoS Comput Biol* **1**, e42 (2005).
- 637 2. J. W. Lichtman, J. R. Sanes, Ome sweet ome: what can the genome tell us about the  
638 connectome? *Curr Opin Neurobiol* **18**, 346-353 (2008).
- 639 3. J. W. Lichtman, W. Denk, The big and the small: challenges of imaging the brain's circuits.  
640 *Science* **334**, 618-623 (2011).
- 641 4. J. Kornfeld, W. Denk, Progress and remaining challenges in high-throughput volume electron  
642 microscopy. *Curr Opin Neurobiol* **50**, 261-267 (2018).
- 643 5. Y. Kubota, J. Sohn, Y. Kawaguchi, Large Volume Electron Microscopy and Neural  
644 Microcircuit Analysis. *Front Neural Circuits* **12**, 98 (2018).
- 645 6. A. Motta, M. Berning, K. M. Boergens, B. Staffler, M. Beining, S. Loomba, P. Hennig, H.  
646 Wissler, M. Helmstaedter, Dense connectomic reconstruction in layer 4 of the somatosensory  
647 cortex. *Science* **366**, (2019).
- 648 7. N. Kasthuri, K. J. Hayworth, D. R. Berger, R. L. Schalek, J. A. Conchello, S. Knowles-  
649 Barley, D. Lee, A. Vazquez-Reina, V. Kaynig, T. R. Jones, M. Roberts, J. L. Morgan, J. C.  
650 Tapia, H. S. Seung, W. G. Roncal, J. T. Vogelstein, R. Burns, D. L. Sussman, C. E. Priebe,  
651 H. Pfister, J. W. Lichtman, Saturated Reconstruction of a Volume of Neocortex. *Cell* **162**,  
652 648-661 (2015).
- 653 8. M. Helmstaedter, K. L. Briggman, S. C. Turaga, V. Jain, H. S. Seung, W. Denk,  
654 Connectomic reconstruction of the inner plexiform layer in the mouse retina. *Nature* **500**,  
655 168-174 (2013).
- 656 9. H. Schmidt, A. Gour, J. Straehle, K. M. Boergens, M. Brecht, M. Helmstaedter, Axonal  
657 synapse sorting in medial entorhinal cortex. *Nature* **549**, 469-475 (2017).
- 658 10. J. A. Harris, S. Mihalas, K. E. Hirokawa, J. D. Whitesell, H. Choi, A. Bernard, P. Bohn, S.  
659 Caldejon, L. Casal, A. Cho, A. Feiner, D. Feng, N. Gaudreault, C. R. Gerfen, N. Graddis, P.  
660 A. Groblewski, A. M. Henry, A. Ho, R. Howard, J. E. Knox, L. Kuan, X. Kuang, J. Lecoq, P.  
661 Lesnar, Y. Li, J. Luviano, S. McConoughey, M. T. Mortrud, M. Naemi, L. Ng, S. W. Oh, B.  
662 Ouellette, E. Shen, S. A. Sorensen, W. Wakeman, Q. Wang, Y. Wang, A. Williford, J. W.  
663 Phillips, A. R. Jones, C. Koch, H. Zeng, Hierarchical organization of cortical and thalamic  
664 connectivity. *Nature* **575**, 195-202 (2019).
- 665 11. S. W. Oh, J. A. Harris, L. Ng, B. Winslow, N. Cain, S. Mihalas, Q. Wang, C. Lau, L. Kuan,  
666 A. M. Henry, M. T. Mortrud, B. Ouellette, T. N. Nguyen, S. A. Sorensen, C. R.  
667 Slaughterbeck, W. Wakeman, Y. Li, D. Feng, A. Ho, E. Nicholas, K. E. Hirokawa, P. Bohn,  
668 K. M. Joines, H. Peng, M. J. Hawrylycz, J. W. Phillips, J. G. Hohmann, P. Wohnoutka, C. R.  
669 Gerfen, C. Koch, A. Bernard, C. Dang, A. R. Jones, H. Zeng, A mesoscale connectome of the  
670 mouse brain. *Nature* **508**, 207-214 (2014).
- 671 12. R. Lin, R. Wang, J. Yuan, Q. Feng, Y. Zhou, S. Zeng, M. Ren, S. Jiang, H. Ni, C. Zhou, H.  
672 Gong, M. Luo, Cell-type-specific and projection-specific brain-wide reconstruction of single  
673 neurons. *Nat Methods* **15**, 1033-1036 (2018).
- 674 13. J. Winnubst, E. Bas, T. A. Ferreira, Z. Wu, M. N. Economo, P. Edson, B. J. Arthur, C. Bruns,  
675 K. Rokicki, D. Schauder, D. J. Olbris, S. D. Murphy, D. G. Ackerman, C. Arshadi, P.  
676 Baldwin, R. Blake, A. Elsayed, M. Hasan, D. Ramirez, B. Dos Santos, M. Weldon, A. Zafar,  
677 J. T. Dudman, C. R. Gerfen, A. W. Hantman, W. Korff, S. M. Sternson, N. Spruston, K.  
678 Svoboda, J. Chandrashekar, Reconstruction of 1,000 Projection Neurons Reveals New Cell  
679 Types and Organization of Long-Range Connectivity in the Mouse Brain. *Cell* **179**, 268-281  
680 e213 (2019).
- 681 14. D. S. Richardson, J. W. Lichtman, Clarifying Tissue Clearing. *Cell* **162**, 246-257 (2015).



- 682 15. H. R. Ueda, H. U. Dodt, P. Osten, M. N. Economo, J. Chandrashekar, P. J. Keller, Whole-  
683 Brain Profiling of Cells and Circuits in Mammals by Tissue Clearing and Light-Sheet  
684 Microscopy. *Neuron* **106**, 369-387 (2020).
- 685 16. H. R. Ueda, A. Erturk, K. Chung, V. Gradinaru, A. Chedotal, P. Tomancak, P. J. Keller,  
686 Tissue clearing and its applications in neuroscience. *Nat Rev Neurosci* **21**, 61-79 (2020).
- 687 17. L. Schermelleh, R. Heintzmann, H. Leonhardt, A guide to super-resolution fluorescence  
688 microscopy. *J Cell Biol* **190**, 165-175 (2010).
- 689 18. N. M. da Costa, K. A. Martin, Selective targeting of the dendrites of corticothalamic cells by  
690 thalamic afferents in area 17 of the cat. *J Neurosci* **29**, 13919-13928 (2009).
- 691 19. S. Holler, G. Kostinger, K. A. C. Martin, G. F. P. Schuhknecht, K. J. Stratford, Structure and  
692 function of a neocortical synapse. *Nature* **591**, 111-116 (2021).
- 693 20. D. C. Pease, Features of the brain stem revealed with electron and phase microscopes. *The*  
694 *Anatomical Record* **115**, 359 (1953).
- 695 21. K. Hama, Some observations on the fine structure of the giant nerve fibers of the earthworm,  
696 *Eisenia foetida*. *J Biophys Biochem Cytol* **6**, 61-66 (1959).
- 697 22. H. Hama, H. Hioki, K. Namiki, T. Hoshida, H. Kurokawa, F. Ishidate, T. Kaneko, T. Akagi,  
698 T. Saito, T. Saido, A. Miyawaki, ScaleS: an optical clearing palette for biological imaging.  
699 *Nat Neurosci* **18**, 1518-1529 (2015).
- 700 23. A. Miyawaki, H. Hama, H. Hioki, K. Namiki, T. Hoshida, H. Kurokawa, Deep Imaging of  
701 Cleared Brain by Confocal Laser-Scanning Microscopy. *Protocol exchange*, (2016).
- 702 24. H. Kameda, H. Hioki, Y. H. Tanaka, T. Tanaka, J. Sohn, T. Sonomura, T. Furuta, F.  
703 Fujiyama, T. Kaneko, Parvalbumin-producing cortical interneurons receive inhibitory inputs  
704 on proximal portions and cortical excitatory inputs on distal dendrites. *Eur J Neurosci* **35**,  
705 838-854 (2012).
- 706 25. M. J. Karnovsky, A formaldehyde-glutaraldehyde fixative of high osmolality for use in  
707 electron microscopy. *J. Cell Biol.* **27**, 137A-138A (1965).
- 708 26. H. Hama, H. Kurokawa, H. Kawano, R. Ando, T. Shimogori, H. Noda, K. Fukami, A.  
709 Sakaue-Sawano, A. Miyawaki, Scale: a chemical approach for fluorescence imaging and  
710 reconstruction of transparent mouse brain. *Nat Neurosci* **14**, 1481-1488 (2011).
- 711 27. S. S. Lam, J. D. Martell, K. J. Kamer, T. J. Deerinck, M. H. Ellisman, V. K. Mootha, A. Y.  
712 Ting, Directed evolution of APEX2 for electron microscopy and proximity labeling. *Nat*  
713 *Methods* **12**, 51-54 (2015).
- 714 28. M. Joesch, D. Mankus, M. Yamagata, A. Shahbazi, R. Schalek, A. Suissa-Peleg, M. Meister,  
715 J. W. Lichtman, W. J. Scheirer, J. R. Sanes, Reconstruction of genetically identified neurons  
716 imaged by serial-section electron microscopy. *Elife* **5**, (2016).
- 717 29. Y. Hirabayashi, J. C. Tapia, F. Polleux, Correlated Light-Serial Scanning Electron  
718 Microscopy (CoLSSEM) for ultrastructural visualization of single neurons in vivo. *Sci Rep* **8**,  
719 14491 (2018).
- 720 30. J. Sohn, M. Takahashi, S. Okamoto, Y. Ishida, T. Furuta, H. Hioki, A Single Vector Platform  
721 for High-Level Gene Transduction of Central Neurons: Adeno-Associated Virus Vector  
722 Equipped with the Tet-Off System. *PLoS One* **12**, e0169611 (2017).
- 723 31. G. E. Alexander, M. D. Crutcher, Functional architecture of basal ganglia circuits: neural  
724 substrates of parallel processing. *Trends Neurosci* **13**, 266-271 (1990).
- 725 32. H. Miyazaki, F. Oyama, R. Inoue, T. Aosaki, T. Abe, H. Kiyonari, Y. Kino, M. Kurosawa, J.  
726 Shimizu, I. Ogiwara, K. Yamakawa, Y. Koshimizu, F. Fujiyama, T. Kaneko, H. Shimizu, K.  
727 Nagatomo, K. Yamada, T. Shimogori, N. Hattori, M. Miura, N. Nukina, Singular localization  
728 of sodium channel beta4 subunit in unmyelinated fibres and its role in the striatum. *Nat*  
729 *Commun* **5**, 5525 (2014).

- 730 33. H. Okano, E. Sasaki, T. Yamamori, A. Iriki, T. Shimogori, Y. Yamaguchi, K. Kasai, A.  
731 Miyawaki, Brain/MINDS: A Japanese National Brain Project for Marmoset Neuroscience.  
732 *Neuron* **92**, 582-590 (2016).
- 733 34. C. T. Miller, W. A. Freiwald, D. A. Leopold, J. F. Mitchell, A. C. Silva, X. Wang,  
734 Marmosets: A Neuroscientific Model of Human Social Behavior. *Neuron* **90**, 219-233  
735 (2016).
- 736 35. G. M. Innocenti, "General Organization of Callosal Connections in the Cerebral Cortex" in  
737 *Sensory-Motor Areas and Aspects of Cortical Connectivity*, E. G. Jones, A. Peters, Eds.  
738 (Springer US, Boston, MA, 1986), pp. 291-353.
- 739 36. E. L. White, D. Czeiger, Synapses made by axons of callosal projection neurons in mouse  
740 somatosensory cortex: emphasis on intrinsic connections. *J Comp Neurol* **303**, 233-244  
741 (1991).
- 742 37. D. Czeiger, E. L. White, Synapses of extrinsic and intrinsic origin made by callosal  
743 projection neurons in mouse visual cortex. *J Comp Neurol* **330**, 502-513 (1993).
- 744 38. P. H. Neckel, U. Mattheus, B. Hirt, L. Just, A. F. Mack, Large-scale tissue clearing (PACT):  
745 Technical evaluation and new perspectives in immunofluorescence, histology, and  
746 ultrastructure. *Sci Rep* **6**, 34331 (2016).
- 747 39. K. Chung, J. Wallace, S. Y. Kim, S. Kalyanasundaram, A. S. Andalman, T. J. Davidson, J. J.  
748 Mirzabekov, K. A. Zalocusky, J. Mattis, A. K. Denisin, S. Pak, H. Bernstein, C.  
749 Ramakrishnan, L. Grose, V. Gradinaru, K. Deisseroth, Structural and molecular  
750 interrogation of intact biological systems. *Nature* **497**, 332-337 (2013).
- 751 40. B. Mihaljevic, R. Benavides-Piccione, C. Bielza, P. Larranaga, J. DeFelipe, Classification of  
752 GABAergic interneurons by leading neuroscientists. *Sci Data* **6**, 221 (2019).
- 753 41. A. Stepanyants, L. M. Martinez, A. S. Ferecsko, Z. F. Kisvarday, The fractions of short- and  
754 long-range connections in the visual cortex. *Proc Natl Acad Sci U S A* **106**, 3555-3560  
755 (2009).
- 756 42. E. Kuramoto, T. Furuta, K. C. Nakamura, T. Unzai, H. Hioki, T. Kaneko, Two types of  
757 thalamocortical projections from the motor thalamic nuclei of the rat: a single neuron-tracing  
758 study using viral vectors. *Cereb Cortex* **19**, 2065-2077 (2009).
- 759 43. W. Matsuda, T. Furuta, K. C. Nakamura, H. Hioki, F. Fujiyama, R. Arai, T. Kaneko, Single  
760 nigrostriatal dopaminergic neurons form widely spread and highly dense axonal arborizations  
761 in the neostriatum. *J Neurosci* **29**, 444-453 (2009).
- 762 44. K. Tainaka, S. I. Kubota, T. Q. Suyama, E. A. Susaki, D. Perrin, M. Ukai-Tadenuma, H.  
763 Ukai, H. R. Ueda, Whole-body imaging with single-cell resolution by tissue decolorization.  
764 *Cell* **159**, 911-924 (2014).
- 765 45. B. Yang, J. B. Treweek, R. P. Kulkarni, B. E. Deverman, C. K. Chen, E. Lubeck, S. Shah, L.  
766 Cai, V. Gradinaru, Single-cell phenotyping within transparent intact tissue through whole-  
767 body clearing. *Cell* **158**, 945-958 (2014).
- 768 46. S. Zhao, M. I. Todorov, R. Cai, R. A. Maskari, H. Steinke, E. Kemter, H. Mai, Z. Rong, M.  
769 Warner, K. Stanic, O. Schoppe, J. C. Paetzold, B. Gesierich, M. N. Wong, T. B. Huber, M.  
770 Duerig, O. T. Bruns, B. Menze, J. Lipfert, V. G. Puelles, E. Wolf, I. Bechmann, A. Erturk,  
771 Cellular and Molecular Probing of Intact Human Organs. *Cell* **180**, 796-812 e719 (2020).
- 772 47. D. Bishop, I. Nikić, M. Brinkoetter, S. Knecht, S. Potz, M. Kerschensteiner, T. Misgeld,  
773 Near-infrared branding efficiently correlates light and electron microscopy. *Nat Methods* **8**,  
774 568-570 (2011).
- 775 48. M. A. Karreman, L. Mercier, N. L. Schieber, G. Solecki, G. Allio, F. Winkler, B.  
776 Ruthensteiner, J. G. Goetz, Y. Schwab, Fast and precise targeting of single tumor cells in  
777 vivo by multimodal correlative microscopy. *J Cell Sci* **129**, 444-456 (2016).

- 778 49. M. Luckner, S. Burgold, S. Filser, M. Scheungrab, Y. Niyaz, E. Hummel, G. Wanner, J.  
779 Herms, Label-free 3D-CLEM Using Endogenous Tissue Landmarks. *iScience* **6**, 92-101  
780 (2018).
- 781 50. Q. Zhang, W. A. Lee, D. L. Paul, D. D. Ginty, Multiplexed peroxidase-based electron  
782 microscopy labeling enables simultaneous visualization of multiple cell types. *Nat Neurosci*  
783 **22**, 828-839 (2019).
- 784 51. K. D. Micheva, S. J. Smith, Array tomography: a new tool for imaging the molecular  
785 architecture and ultrastructure of neural circuits. *Neuron* **55**, 25-36 (2007).
- 786 52. S. Hippenmeyer, E. Vrieseling, M. Sigrist, T. Portmann, C. Laengle, D. R. Ladle, S. Arber, A  
787 developmental switch in the response of DRG neurons to ETS transcription factor signaling.  
788 *PLoS Biol* **3**, e159 (2005).
- 789 53. C. A. Schneider, W. S. Rasband, K. W. Eliceiri, NIH Image to ImageJ: 25 years of image  
790 analysis. *Nat Methods* **9**, 671-675 (2012).
- 791 54. T. Sonomura, T. Furuta, I. Nakatani, Y. Yamamoto, T. Unzai, W. Matsuda, H. Iwai, A.  
792 Yamanaka, M. Uemura, T. Kaneko, Correlative analysis of immunoreactivity in confocal  
793 laser-scanning microscopy and scanning electron microscopy with focused ion beam milling.  
794 *Front Neural Circuits* **7**, 26 (2013).
- 795 55. D. S. Bindels, L. Haarbosch, L. van Weeren, M. Postma, K. E. Wiese, M. Mastop, S.  
796 Aumonier, G. Gotthard, A. Royant, M. A. Hink, T. W. Gadella, Jr., mScarlet: a bright  
797 monomeric red fluorescent protein for cellular imaging. *Nat Methods* **14**, 53-56 (2017).
- 798 56. S. Okamoto, J. Sohn, T. Tanaka, M. Takahashi, Y. Ishida, K. Yamada, M. Koike, F.  
799 Fujiyama, H. Hioki, Overlapping Projections of Neighboring Direct and Indirect Pathway  
800 Neostriatal Neurons to Globus Pallidus External Segment. *iScience*, in press (2020).
- 801 57. S. Okamoto, K. Yamauchi, J. Sohn, M. Takahashi, Y. Ishida, T. Furuta, M. Koike, F.  
802 Fujiyama, H. Hioki, Exclusive labeling of direct and indirect pathway neurons in the mouse  
803 neostriatum by an adeno-associated virus vector with Cre/lox system. *STAR Protoc* **2**, 100230  
804 (2021).
- 805 58. A. Watakabe, M. Ohtsuka, M. Kinoshita, M. Takaji, K. Isa, H. Mizukami, K. Ozawa, T. Isa,  
806 T. Yamamori, Comparative analyses of adeno-associated viral vector serotypes 1, 2, 5, 8 and  
807 9 in marmoset, mouse and macaque cerebral cortex. *Neurosci Res* **93**, 144-157 (2015).
- 808 59. T. Furuta, T. Kaneko, M. Deschenes, Septal neurons in barrel cortex derive their receptive  
809 field input from the lemniscal pathway. *J Neurosci* **29**, 4089-4095 (2009).
- 810 60. Y. Kanda, Investigation of the freely available easy-to-use software 'EZR' for medical  
811 statistics. *Bone Marrow Transplant* **48**, 452-458 (2013).
- 812

813 **Acknowledgments**

814 The authors thank Drs Atsushi Miyawaki and Hiroshi Hama (RIKEN Center for Brain  
815 Science) for their critical reading of the manuscript and constructive advice, and Editage  
816 (www.editage.com) for English language editing. We are also grateful to Keiko Okamoto-Furuta and  
817 Haruyasu Kohda (Division of Electron Microscopic Study, Center for Anatomical Studies, Graduate  
818 School of Medicine, Kyoto University) for technical assistance in electron microscopy.

819 **Funding:** This study was supported by JSPS KAKENHI (JP20K07231 to K.Y.; JP20K07743 to  
820 M.K.; JP16H04663 and JP17K19451 to H.H.) and Scientific Research on Innovative Area  
821 “Resonance Bio” (18H04743 to H.H.) from MEXT. This study was also supported by the Japan  
822 Agency for Medical Research and Development (AMED) (JP20dm0207063 to F.T.;  
823 JP19dm0207093 and JP18dm0207020 to T.I.; JP20dm0207064 to H.H.), Grants-in-Aid from the  
824 Research Institute for Diseases of Old Age at the Juntendo University School of Medicine (X2016 to  
825 K.Y.; X2001 to H.H.), and MEXT Private University Research Branding Project (Juntendo  
826 University).

827 **Author contributions:** T.F., K.Y., and H.H. designed the study; T.F., K.Y., K.I., S.O., M.T., S.K.,  
828 Y.I., and H.H. executed the experiments; T.F., K.Y., M.T., S.K., Y.I., A.T., and H.H. analyzed the  
829 data; T.F., K.Y., and H.H. wrote the original draft; T.F., K.Y., A.Y., Y.U., M.K., T.I., and H.H.  
830 edited the manuscript. All authors discussed the results and concurred on the contents of this  
831 manuscript.

832 **Competing interests:** Authors declare that they have no competing interests.

833 **Data and materials availability:** The datasets generated during and/or analyzed during the current  
834 study and all biological materials reported in this article are available from the corresponding author  
835 on reasonable request.

836 **Figures**

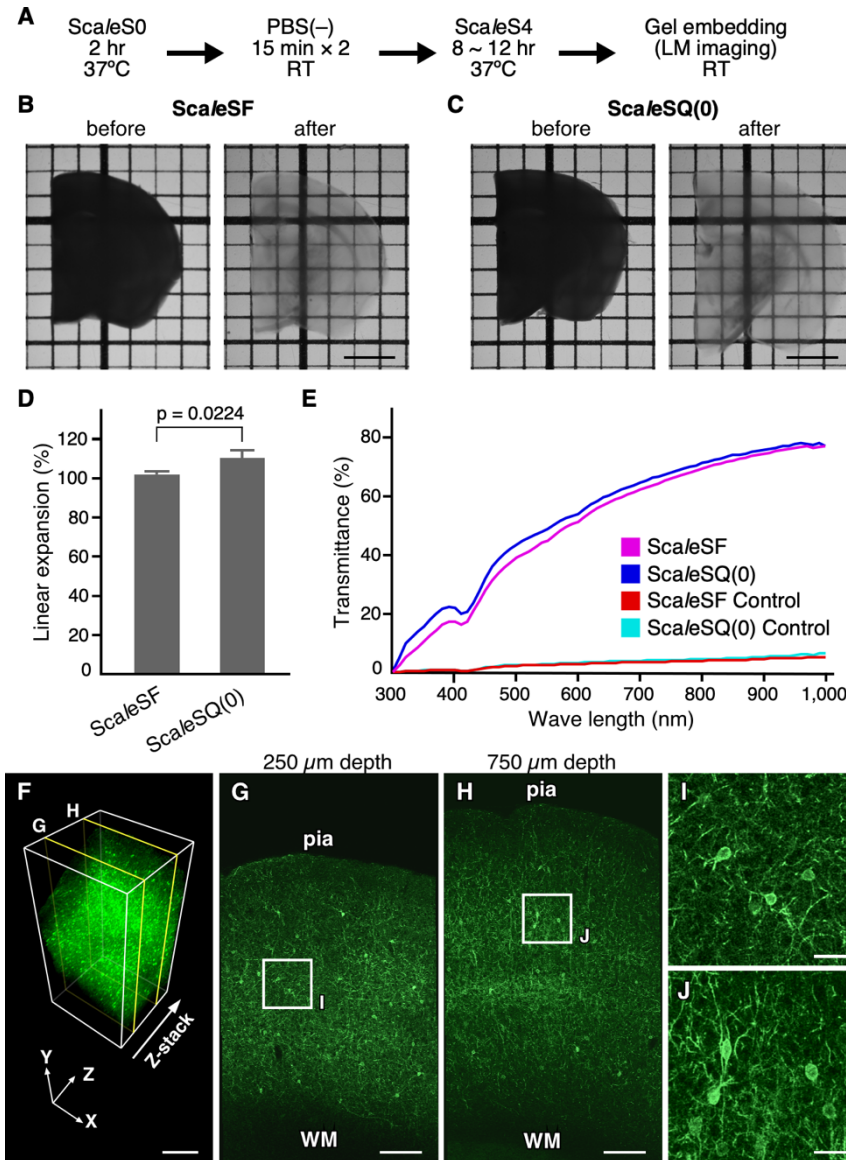

837

838 **Fig. 1. ScaleSF is an isometric and rapid optical clearing method.**

839 (A) The schedule for tissue clearing with ScaleSF. (B, C) Transmission images of 1-mm-thick brain  
 840 slices before (left) and after (right) treatment with ScaleSF (B) and ScaleSQ(0) (C). The grid interval  
 841 is 1 mm. (D) Change in size of brain slices after ScaleSF and ScaleSQ(0) treatment ( $n = 3$ , ScaleSF;  
 842  $n = 4$ , ScaleSQ(0);  $t = 3.261$ ,  $df = 5$ ,  $P = 0.0224$ , two-tailed unpaired Student's  $t$ -test). Error bars  
 843 represent SDs. (E) Transmission curves of the control, ScaleSF-, and ScaleSQ(0)-treated mouse  
 844 brain slices ( $n = 3$  brain hemispheres each). (F) Three-dimensional volume rendering of the cerebral  
 845 cortex of a PV-FGL mouse cleared with ScaleSF. In the PV-FGL mouse, somatodendritic  
 846 membrane-targeted EGFP expression is driven by a parvalbumin promoter. (G, H)  $xy$  images in (F)  
 847 at the depths of 250 μm (G) and 750 μm (H). (I, J) Enlarged views of rectangles in (G) and (H). pia,  
 848 pia mater; WM, white matter. Scale bars: 2 mm in (B, C), 500 μm in (F), 200 μm in (G, H), and 40  
 849 μm in (I, J).

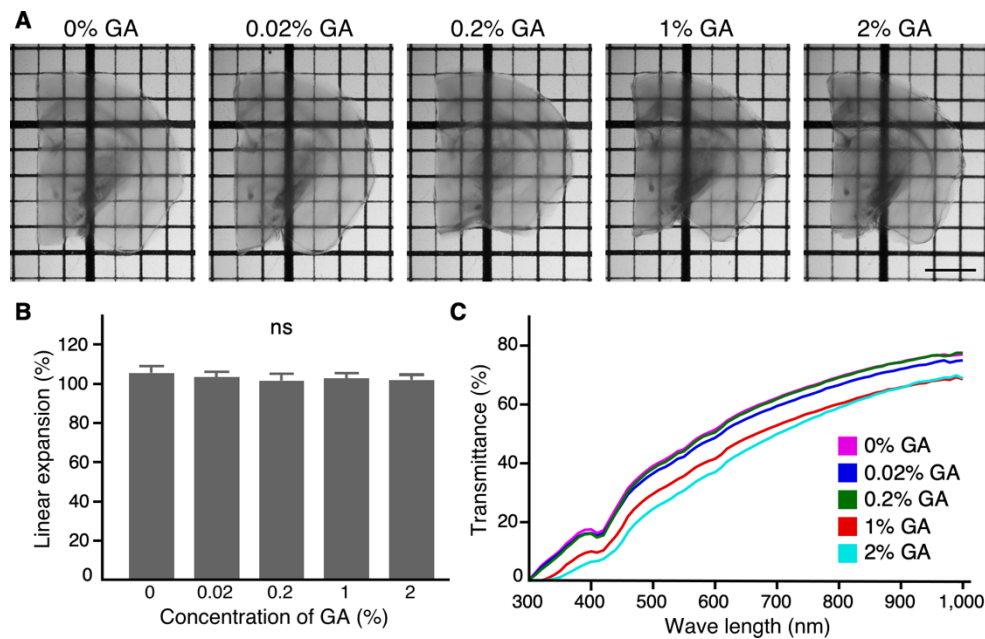

850

851 **Fig. 2. ScaleSF clears brain slices fixed with GA.**

852 (A) Transmission images of ScaleSF-treated mouse brain slices fixed with 4% PFA or 4% PFA  
853 containing GA (0.02, 0.2, 1 or 2%). The thickness of brain slices and the grid interval are 1 mm. (B)  
854 Change in size of brain slices after ScaleSF treatment (n = 8, GA 0%; n = 8, GA 0.02%; n = 8, GA  
855 0.2%; n = 8, GA 1%; n = 7, GA 2%; n = 4 mice for each condition;  $F_{4,34} = 1.975$ ,  $P = 0.121$ , one-way  
856 ANOVA). Error bars represent SDs. (C) Transmission curves of ScaleSF-treated mouse brain slices  
857 fixed with 4% PFA or 4% PFA containing GA (0.02, 0.2, 1, or 2%) (n = 3 brain hemispheres each).  
858 Scale bar: 2 mm.

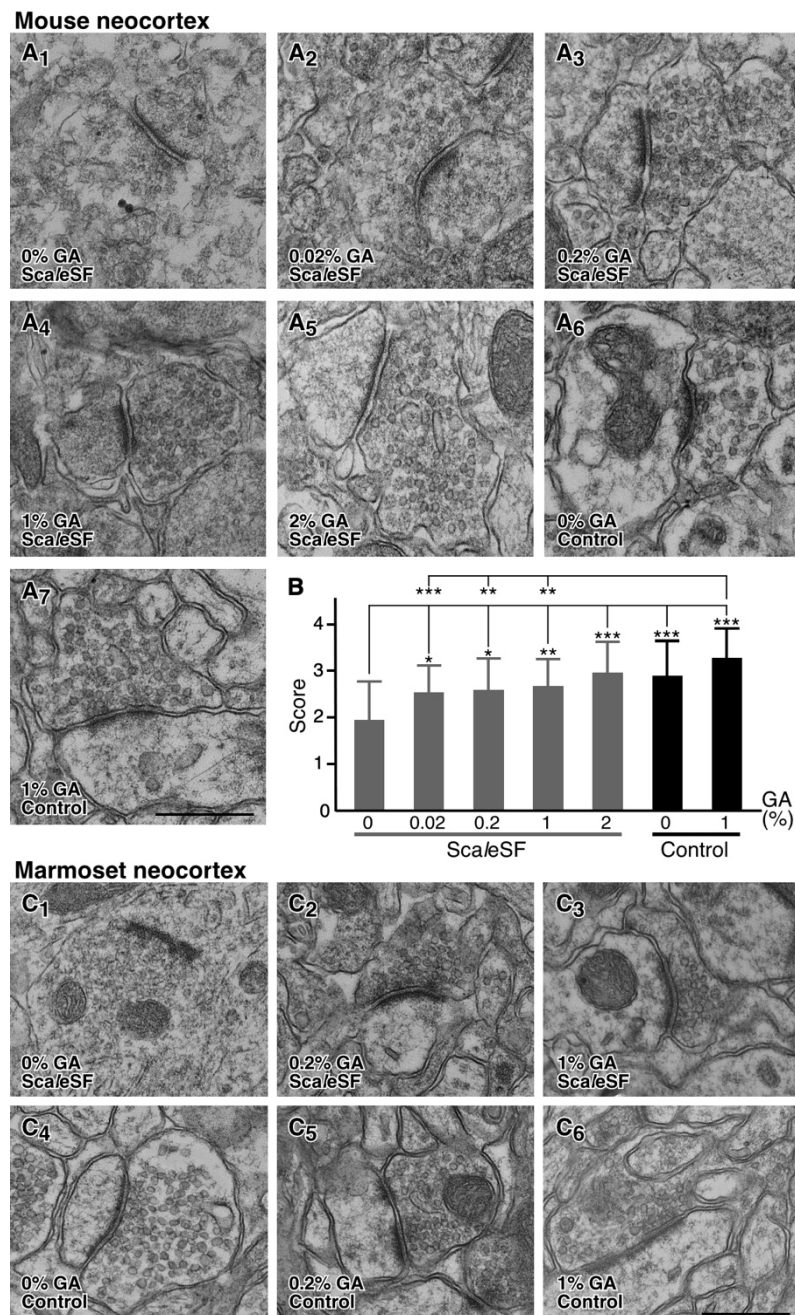

859

860 **Fig. 3. GA preserves ultrastructure in both mouse and marmoset brain slices cleared with**  
861 **ScaleSF.**

862 (A) TEM images of mouse cerebral cortex cleared with ScaleSF (A<sub>1</sub> to A<sub>5</sub>) or stored in PBS(–) (A<sub>6</sub>,  
863 A<sub>7</sub>). Mice were fixed with 4% PFA (A<sub>1</sub>, A<sub>6</sub>) or 4% PFA containing GA (0.02%, A<sub>2</sub>; 0.2%, A<sub>3</sub>; 1%,  
864 A<sub>4</sub>, A<sub>7</sub> or 2%, A<sub>5</sub>). (B) Scoring of membrane continuity of presynaptic terminals for each condition  
865 in (A). Over 90%, 50–90%, 10–50%, and less than 10% membrane continuity of presynaptic  
866 terminals are scored as 4, 3, 2, and 1, respectively (n = 31 synapses, GA 0%, ScaleSF; n = 52  
867 synapses, GA 0.02%, ScaleSF; n = 33 synapses, GA 0.2%, ScaleSF; n = 34 synapses, GA 1%,  
868 ScaleSF; n = 31 synapses, GA 2%, ScaleSF; n = 32 synapses, GA 0%, Control; n = 31 synapses, GA  
869 1%, Control; n = 3 mice for each condition;  $H = 52.44$ ,  $df = 6$ ,  $P = 1.52 \times 10^{-9}$  Kruskal–Wallis test; \*  
870  $P < 0.05$ , \*\*  $P < 0.01$ , \*\*\*  $P < 0.001$ ; Steel–Dwass post hoc test). (C) TEM images of the cerebral  
871 cortex of marmosets. Ultrathin sections were prepared from brain slices cleared with ScaleSF (C<sub>1</sub> to  
872 C<sub>3</sub>) or stored in PBS(–) (C<sub>4</sub> to C<sub>6</sub>). Marmosets were fixed with 4% PFA (C<sub>1</sub>, C<sub>4</sub>), 4% PFA containing  
873 0.2% (C<sub>2</sub>, C<sub>5</sub>), or 1% GA (C<sub>3</sub>, C<sub>6</sub>) (n = 4 marmosets). Scale bars: 500 nm.

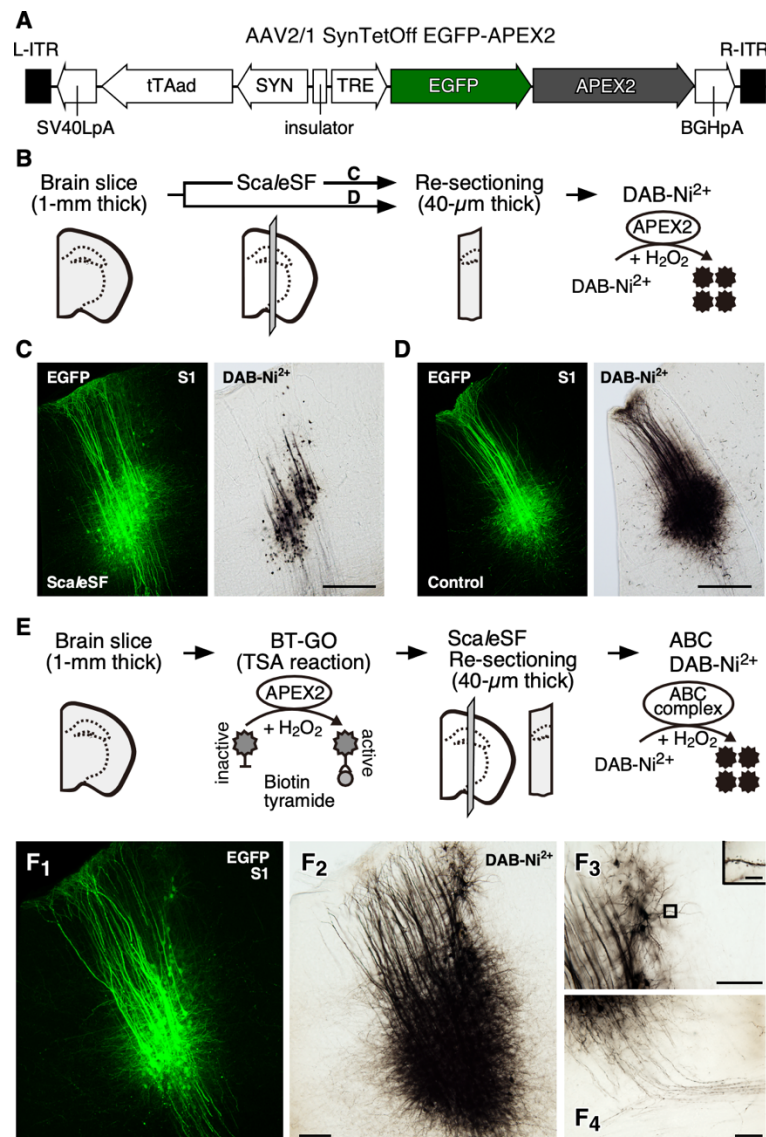

874

875 **Fig. 4. APEX2/BT-GO reaction enables correlated imaging of EGFP and DAB-Ni<sup>2+</sup> polymers**  
 876 **after ScaleSF treatment.**

877 (A) AAV2/1-SynTetOff-EGFP-APEX2-BGHpA vector. (B) A schematic diagram of DAB-Ni<sup>2+</sup>  
 878 labeling with APEX2. (C, D) DAB-Ni<sup>2+</sup> labeling with APEX2 in mouse brain sections prepared  
 879 from brain slices cleared with ScaleSF (C, n = 6 injection sites from 3 mice) or stored in PBS(-) (D,  
 880 n = 7 injection sites from 4 mice). Correlated fluorescent (left) and bright-field (right) images in  
 881 neurons infected with the AAV vector. After imaging with CLSM, sections are developed in DAB-  
 882 Ni<sup>2+</sup> solution. (E) A schematic diagram of APEX2/BT-GO reaction-mediated signal amplification.  
 883 Prior to clearing brain slices with ScaleSF, biotin molecules are deposited with TSA reaction using  
 884 its peroxidase activity of APEX2. The cleared slices are cut into 40-μm-thick sections and the  
 885 sections are processed for ABC/DAB-Ni<sup>2+</sup> visualization. (F) Correlated fluorescent (F<sub>1</sub>) and bright-  
 886 field (F<sub>2</sub>) images in a section of a mouse cerebral cortex processed with APEX2/BT-GO reaction-  
 887 mediated signal amplification (n = 7 injection sites from 4 mice). High magnification images of  
 888 dendrites (F<sub>3</sub>), dendritic spines (the inset in F<sub>3</sub>), and axon fibers (F<sub>4</sub>) in the bright-field image are also  
 889 shown. BGHpA: polyadenylation signal derived from the bovine growth hormone gene, ITR:  
 890 inverted terminal repeat, SV40LpA: polyadenylation signal of Simian virus 40 late, SYN: human  
 891 synapsin I promoter, TRE: tetracycline-responsive element, tTAad: an improved version of a  
 892 tetracycline-controlled transactivator. Scale bars: 500 μm in (C, D), 100 μm in (F<sub>2</sub>), 50 μm in (F<sub>3</sub>,  
 893 F<sub>4</sub>), and 5 μm in (the inset in F<sub>3</sub>).



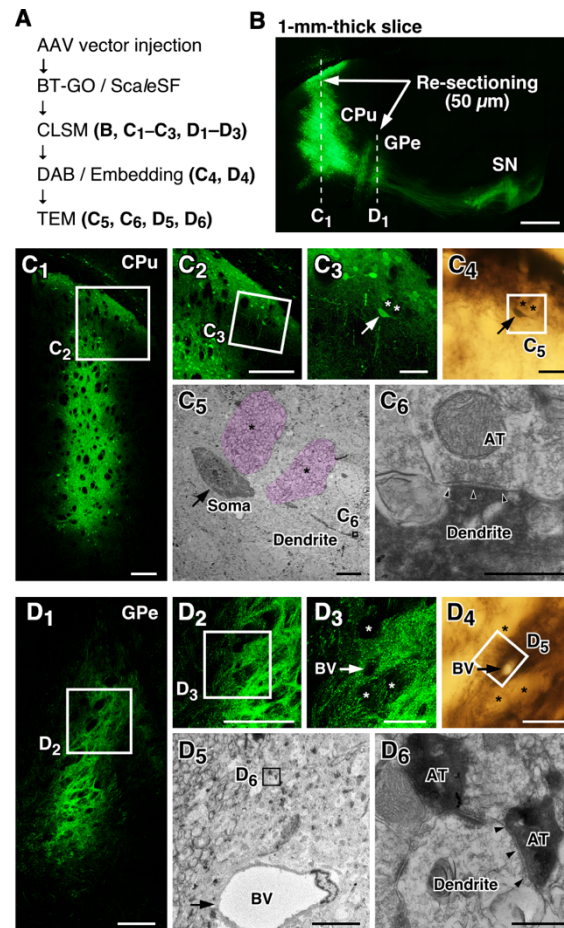

894

895 **Fig. 5. Multi-scale LM/EM neuronal imaging of mouse CPu neurons.**

896 (A) The procedure of multi-scale LM/EM neuronal imaging of mouse CPu neurons. (B) A maximum  
 897 intensity projection image of a 1-mm-thick parasagittal brain slice cleared with ScaleSF. AAV2/1-  
 898 SynTetOff-EGFP-APEX2-BGHpA vector is injected into the CPu. Sections of 50-μm thickness are  
 899 cut along dotted lines. (C, D) Correlated fluorescent (C<sub>1</sub> to C<sub>3</sub>, D<sub>1</sub> to D<sub>3</sub>), bright-field (C<sub>4</sub>, D<sub>4</sub>) and  
 900 TEM images (C<sub>5</sub>, C<sub>6</sub>, D<sub>5</sub>, D<sub>6</sub>) at the level of CPu (C) and GPe (D). (C<sub>1</sub>, D<sub>1</sub>) CLSM imaging. (C<sub>2</sub>, C<sub>3</sub>,  
 901 D<sub>2</sub>, D<sub>3</sub>) Enlarged views of rectangles in (C<sub>1</sub>), (C<sub>2</sub>), (D<sub>1</sub>), and (D<sub>2</sub>), respectively. (C<sub>4</sub>, D<sub>4</sub>) DAB-Ni<sup>2+</sup>  
 902 labeling with APEX2/BT-GO reaction. (C<sub>5</sub>, D<sub>5</sub>) A TEM image of the rectangle in (C<sub>4</sub>) and (D<sub>4</sub>). (C<sub>6</sub>,  
 903 D<sub>6</sub>) A high magnification image of the rectangle in (C<sub>5</sub>) and (D<sub>5</sub>). A neuron indicated by arrows in  
 904 (C<sub>3</sub>, C<sub>4</sub>) is targeted. Asterisks in (C<sub>3</sub> to C<sub>5</sub>) and (D<sub>3</sub>, D<sub>4</sub>) indicate the same bundles of axonal fibers in  
 905 (C) and (D), respectively. Arrows in (D<sub>3</sub> to D<sub>5</sub>) indicate the identical blood vessel. Arrowheads in  
 906 (C<sub>6</sub>, D<sub>6</sub>) indicate postsynaptic membranes. AT, axon terminal; BV, blood vessel. Scale bars: 500 μm  
 907 in (B), 200 μm in (C<sub>1</sub>, C<sub>2</sub>, D<sub>1</sub>, D<sub>2</sub>), 50 μm in (C<sub>3</sub>, C<sub>4</sub>, D<sub>3</sub>, D<sub>4</sub>), 10 μm in (C<sub>5</sub>, D<sub>5</sub>), and 500 nm in (C<sub>6</sub>,  
 908 D<sub>6</sub>).

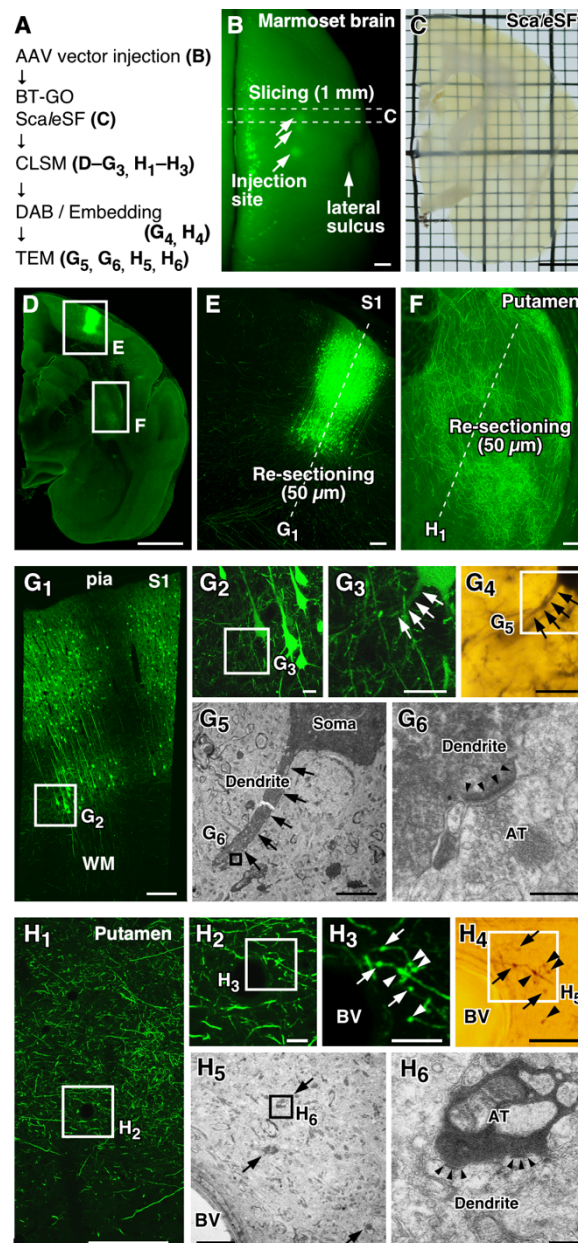

909

910

**Fig. 6. Multi-scale LM/EM neuronal imaging of cortical neurons in a marmoset.**

911 (A) The procedure of multi-scale LM/EM neuronal imaging. (B) EGFP fluorescence (arrowheads) in

912 a marmoset brain six weeks after injection of the AAV2/1-SynTetOff-EGFP-APEX2-BGHpA

913 vector. A 1-mm-thick slice is cut along dotted lines. (C) A transmission image of the slice cleared

914 with Scale/SF. (D–F) Maximum intensity projection images of the cleared slice. (E, F) Enlarged

915 views of the S1 (E) and putamen (F). Sections of 50 μm thickness are cut along dotted lines. (G, H)

916 Correlated fluorescent (G<sub>1</sub> to G<sub>3</sub>, H<sub>1</sub> to H<sub>3</sub>), bright-field (G<sub>4</sub>, H<sub>4</sub>), and TEM images (G<sub>5</sub>, G<sub>6</sub>, H<sub>5</sub>, H<sub>6</sub>)

917 in the S1 (G) and putamen (H). (G<sub>1</sub>, H<sub>1</sub>) CLSM imaging. (G<sub>2</sub>, G<sub>3</sub>, H<sub>2</sub>, H<sub>3</sub>) Enlarged views of the

918 rectangles in (G<sub>1</sub>), (G<sub>2</sub>), (H<sub>1</sub>), and (H<sub>2</sub>), respectively. (G<sub>4</sub>, H<sub>4</sub>) DAB-Ni<sup>2+</sup> labeling with APEX2/BT-

919 GO reaction. (G<sub>5</sub>, H<sub>5</sub>) TEM images of the rectangle in (G<sub>4</sub>) and (H<sub>4</sub>). (G<sub>6</sub>, H<sub>6</sub>) A high magnification

920 image of the rectangle in (G<sub>5</sub>) and (H<sub>5</sub>). A synaptic structure (arrowheads in G<sub>6</sub>) in a dendrite (arrows

921 in G<sub>3</sub> to G<sub>5</sub>) of a pyramidal neuron is targeted in (H) and synaptic structures (arrowheads in H<sub>6</sub>)

922 between a cortical axon and a putamen dendrite are targeted in (G). Arrows in (H<sub>3</sub> to H<sub>5</sub>) and

923 arrowheads in (H<sub>3</sub>, H<sub>4</sub>) indicate the same presynaptic terminals. BV: blood vessel. Scale bars: 3 mm

924 in (B to D), 200 μm in (E, F, G<sub>1</sub>, H<sub>1</sub>), 20 μm in (G<sub>2</sub> to G<sub>4</sub>, H<sub>2</sub> to H<sub>4</sub>), 5 μm in (G<sub>5</sub>, H<sub>5</sub>), and 300 nm in

925

(G<sub>6</sub>, H<sub>6</sub>).

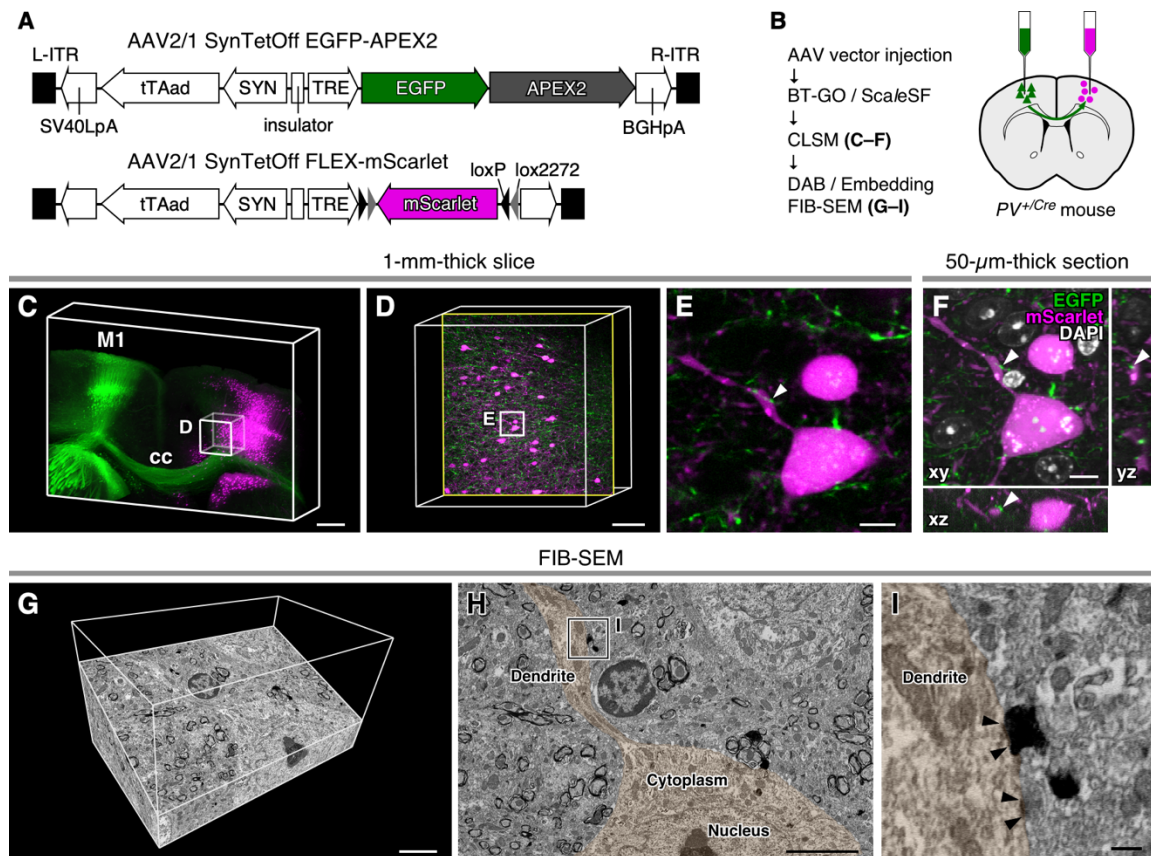

**Fig. 7. Multi-scale LM/EM neuronal imaging of a mouse callosal synaptic input onto PV neocortical interneurons.**

(A) AAV2/1-SynTetOff-EGFP-APEX2-BGHpA vector and AAV2/1-SynTetOff-FLEX-mScarlet-BGHpA vector. (B) The procedure of multi-scale LM/EM neuronal imaging of mouse callosal synaptic inputs onto PV neocortical interneurons. (C–E) CLSM imaging of a 1-mm-thick brain slice. (C) Three-dimensional volume rendering of the M1 of a *PV<sup>+cre</sup>* mouse injected with the AAV vectors. (D) An enlarged and high-resolution image of the box in (C). The image is 90° rotated in a counterclockwise direction with respect to (C). An optical section with an axodendritic apposition in (E) is shown. (E) A higher magnification image of the rectangle in (D). (F) CLSM imaging in a resection. A 50-µm-thick section was cut parallel to the *xy* plane from the slice imaged in (C to E). Orthogonal views of the *xz* plane (bottom) and the *yz* (right) are also shown. Arrowheads in (E, F) indicate the same axodendritic apposition. (G–I) FIB-SEM tomography of the axodendritic apposition. (G) A three-dimensional volume rendering image. (H) An oblique slice view. (I) An enlarged view of the rectangle in (H). Arrowheads in (I) indicate the PSD. The profiles of postsynaptic dendrite and soma of the targeted axodendritic apposition (arrowheads in E, F) are pseudocolored in (H, I) for clarity. BGHpA: polyadenylation signal derived from the bovine growth hormone gene, cc: corpus callosum, ITR: inverted terminal repeat, SV40LpA: polyadenylation signal of Simian virus 40 late, SYN: human synapsin I promoter, TRE: tetracycline-responsive element, tTAad: an improved version of a tetracycline-controlled transactivator. Scale bars: 500 µm in (C), 100 µm in (D), 10 µm in (E, F), 5 µm in (G, H), and 500 nm in (I).

926  
927  
928  
929  
930  
931  
932  
933  
934  
935  
936  
937  
938  
939  
940  
941  
942  
943  
944  
945  
946
